# Supplementary material for: Supervised exercise delivered via telehealth in real time to manage chronic conditions in adults: a protocol for a scoping review to inform future research in stroke survivors
Source: PubMed Central journal article supplement — BMJ Open. 2019 Mar 20;9(3):e027416. doi: 10.1136/bmjopen-2018-027416 (PMC6527978; doi:10.1136/bmjopen-2018-027416), 2019-03-20
Supplement: bmjopen-2018-027416.draft_revisions.pdf [file bmjopen-2018-027416.draft_revisions.pdf]

# BMJ Open

BMJ Open is committed to open peer review. As part of this commitment we make the peer review history of every article we publish publicly available.

When an article is published we post the peer reviewers' comments and the authors' responses online. We also post the versions of the paper that were used during peer review. These are the versions that the peer review comments apply to.

The versions of the paper that follow are the versions that were submitted during the peer review process. They are not the versions of record or the final published versions. They should not be cited or distributed as the published version of this manuscript.

BMJ Open is an open access journal and the full, final, typeset and author-corrected version of record of the manuscript is available on our site with no access controls, subscription charges or pay-per-view fees (<http://bmjopen.bmj.com>).

If you have any questions on BMJ Open's open peer review process please email [info.bmjopen@bmj.com](mailto:info.bmjopen@bmj.com)

# BMJ Open

## Supervised exercise delivered via telehealth in real-time to manage chronic conditions in adults: A protocol for a scoping review to inform future research in stroke survivors

|                               |                                                                                                                                                                                                                                                                                                                                                                                                                                                                                                                                                                                                                                                                                              |
|-------------------------------|----------------------------------------------------------------------------------------------------------------------------------------------------------------------------------------------------------------------------------------------------------------------------------------------------------------------------------------------------------------------------------------------------------------------------------------------------------------------------------------------------------------------------------------------------------------------------------------------------------------------------------------------------------------------------------------------|
| Journal:                      | <i>BMJ Open</i>                                                                                                                                                                                                                                                                                                                                                                                                                                                                                                                                                                                                                                                                              |
| Manuscript ID                 | bmjopen-2018-027416                                                                                                                                                                                                                                                                                                                                                                                                                                                                                                                                                                                                                                                                          |
| Article Type:                 | Protocol                                                                                                                                                                                                                                                                                                                                                                                                                                                                                                                                                                                                                                                                                     |
| Date Submitted by the Author: | 22-Oct-2018                                                                                                                                                                                                                                                                                                                                                                                                                                                                                                                                                                                                                                                                                  |
| Complete List of Authors:     | Ramage, Emily; University of Newcastle, School of Health Sciences; Western Health, Physiotherapy<br>Fini, Natalie; University of Melbourne, School of Health Sciences , Physiotherapy; La Trobe University, Physiotherapy<br>Lynch, Elizabeth; University of Adelaide, Adelaide Nursing School<br>Patterson, Amanda; University of Newcastle, School of Health Sciences<br>Said, Catherine; Western Health, Physiotherapy; The University of Melbourne, Physiotherapy<br>English, Coralie; University of Newcastle, School of Health Sciences; Centre for Research Excellence in Stroke Recovery and Rehabilitation , Florey Institute of Neuroscience and Hunter Medical Research Institute |
| Keywords:                     | Telehealth, Telerehabilitation, Supervised exercise, Physical activity, Secondary stroke, Stroke < NEUROLOGY                                                                                                                                                                                                                                                                                                                                                                                                                                                                                                                                                                                 |
|                               |                                                                                                                                                                                                                                                                                                                                                                                                                                                                                                                                                                                                                                                                                              |

SCHOLARONE™  
Manuscripts

**Title:** Supervised exercise delivered via telehealth in real-time to manage chronic conditions in adults: A protocol for a scoping review to inform future research in stroke survivors

**Authors:**

1. Emily R. Ramage, BPhysio (Hons),  
PhD Candidate, School of Health Sciences, University of Newcastle, Australia,  
Department of Physiotherapy, Western Health, St Albans, Australia  
Centre for Research Excellence in Stroke Recovery and Rehabilitation, Florey Institute of  
Neuroscience and Hunter Medical Research Institute, Australia  
Email: [emily.ramage@uon.edu.au](mailto:emily.ramage@uon.edu.au) Twitter: @EmilyRRamage
2. Natalie A. Fini, BPhysio (Hons), Grad Dip Rehab,  
PhD Candidate, La Trobe University, Bundoora, Australia  
Lecturer, Department of Physiotherapy, Melbourne School of Health Sciences,  
the University of Melbourne, Australia  
Email: [natalie.fini@unimelb.edu.au](mailto:natalie.fini@unimelb.edu.au) Twitter: @NatFiniPhysio
3. Elizabeth A. Lynch, PhD  
Research Fellow, Adelaide Nursing School, University of Adelaide  
Email: [elizabeth.lynch@adelaide.edu.au](mailto:elizabeth.lynch@adelaide.edu.au) Twitter: @E\_A\_Lynch
4. Amanda Patterson, M Nutr & Diet, PhD  
Senior Lecturer, School of Health Sciences and Priority Research Centre for Stroke and  
Brain Injury, University of Newcastle, Australia
5. Catherine M. Said, PhD  
Associate Professor Physiotherapy, Western Health, Furlong Rd, St Albans, Australia

Physiotherapy, University of Melbourne, Parkville, Australia

Australian Institute for Musculoskeletal Science, Furlong Rd, St Albans, Australia

Phone +61 3 8395 8106, email [csaid@unimelb.edu.au](mailto:csaid@unimelb.edu.au); Twitter @cathy\_said

6. Coralie English, PhD

Associate Professor, School of Health Sciences and Priority Research Centre for Stroke and Brain Injury, University of Newcastle, Australia

Centre for Research Excellence in Stroke Recovery and Rehabilitation, Florey Institute of Neuroscience and Hunter Medical Research Institute, Australia

Phone: +61 2 4913 8102 E-mail: [Coralie.english@newcastle.edu.au](mailto:Coralie.english@newcastle.edu.au) Twitter: @Coralie\_English

**Correspondence (for review):**

|             |                                                                      |
|-------------|----------------------------------------------------------------------|
| Name        | Emily Ramage                                                         |
| Department  | School of Health Sciences                                            |
| Institution | University of Newcastle                                              |
| Country     | Australia                                                            |
| Tel         | +61 408 669 204                                                      |
| Mob         | +61 408 669 204                                                      |
| Fax         |                                                                      |
| Email       | <a href="mailto:emily.ramage@uon.edu.au">emily.ramage@uon.edu.au</a> |

**Correspondence (for publication)**

|             |                           |
|-------------|---------------------------|
| Name        | Emily Ramage              |
| Department  | School of Health Sciences |
| Institution | University of Newcastle   |
| Country     | Australia                 |
| Email       | emily.ramage@uon.edu.au   |

**Abbreviated title:** Supervised exercise delivered via telehealth: A scoping review protocol

**Key words:** Telehealth, telerehabilitation, supervised exercise, stroke, physical activity, secondary stroke, stroke recurrence

**Word Count:** 291 words (Abstract)  
2459 (Strengths and Limitations, Introduction, Methods and Analysis, Ethics and Dissemination)

**References:** 44

**Box:** 1

**Tables:** Nil

**Figures:** Nil

**Appendices:** 1

**Ethics approval:** The review will utilise only secondary de-identified data and therefore ethics approval is not required

1  
2  
3 **Funding:** Emily Ramage was supported by an Australian Government Research Training  
4 Program Scholarship. Associate Professor English was supported by a National Heart Foundation  
5 Future Leaders Fellowship (#101177). Dr Elizabeth Anne Lynch was supported by a National  
6 Health and Medical Research Council Early Career Research Fellowship (#1138515).  
7  
8  
9  
10  
11  
12  
13

14 **Acknowledgements:** The authors would like to acknowledge the contribution of Ms Debbie  
15 Booth, Senior Research Librarian at the University of Newcastle for her assistance and advice in  
16 drafting the search strategy.  
17  
18  
19  
20

21 **Competing interests:** ERR reports support from an Australian Government Research Training  
22 Program Scholarship. CE reports support from the National Heart Foundation of Australia and  
23 EAL reports support from the National Health and Medical Research Council.  
24  
25  
26  
27  
28  
29  
30  
31  
32  
33  
34  
35  
36  
37  
38  
39  
40  
41  
42  
43  
44  
45  
46  
47  
48  
49  
50  
51  
52  
53  
54  
55  
56  
57

## ABSTRACT

**Introduction:** Increasing physical activity reduces secondary stroke risk factors, but many stroke survivors have low levels of physical activity. Supervised exercise delivered via telehealth has the potential to overcome barriers to increased physical activity in stroke survivors. Our scoping review will examine the emerging field of supervised exercise delivered via telehealth to map the available evidence in relation to its efficacy, acceptability, safety and feasibility in chronic conditions to inform future research into its ability to increase physical activity.

**Methods and analysis:** The methodological framework of Arksey and O'Malley will be applied to our scoping review. A systematic search of (Medline, CINAHL, Scopus, Cochrane, Pedro and Embase); hand searching of pertinent studies' reference lists; and consultation with experts in the field will identify relevant papers. Studies involving subjects with a chronic condition who undertake supervised exercise delivered by a health professional via telehealth targeted at improving secondary stroke risk factors or involving lower limb weightbearing exercise will be included. Study selection and critical appraisal of individual studies will be carried out independently by two authors with discrepancies resolved by a third author. Quantitative data will be charted. Qualitative data will be extracted, thematically analysed and charted alongside. Results will be tabulated and narratively summarized to highlight findings relevant to the review's research questions and inform recommendations for future research.

**Ethics and dissemination:** Our review will significantly contribute to the knowledge base of

1  
2  
3 exercise and rehabilitation delivered via telehealth and its application in chronic conditions,  
4 including stroke. Findings will be relevant to researchers, healthcare workers and policy makers  
5 and will be disseminated through publication and presentations. Only secondary de-identified data  
6 will be included, therefore ethics approval will not be sought.  
7  
8  
9  
10  
11

12 This protocol is not registered as PROSPERO currently excludes scoping reviews.  
13

14 *Keywords:* Telehealth, telerehabilitation, supervised exercise, stroke, physical activity, secondary  
15 stroke  
16  
17  
18  
19  
20  
21  
22  
23  
24  
25  
26  
27  
28  
29  
30  
31  
32  
33  
34  
35  
36  
37  
38  
39  
40  
41  
42  
43  
44  
45  
46  
47  
48  
49  
50  
51  
52  
53  
54  
55  
56  
57



**Strengths and limitations of this study:**

- Our comprehensive scoping review will bring together research findings regarding supervised exercise delivered via telehealth to inform its future application to research and practice across chronic conditions
- The inclusion of all research study designs will ensure the breadth of evidence regarding supervised exercise delivered via telehealth is captured
- We will use a published framework to optimise transparency and methodological rigor
- To facilitate accurate analysis of the evidence and its role in informing future research, quantitative studies will be individually assessed for bias and qualitative studies will be individually assessed for methodological rigor
- A limitation of this review will be the exclusion of unpublished literature for which authors are unable to provide sufficient additional information, and research not published in English.

## Introduction

Stroke is the second leading cause of death and burden of disease worldwide<sup>1 2</sup>. The number of people experiencing stroke is increasing, with estimates predicting 70 million stroke survivors and 12 million stroke related deaths worldwide in 2030<sup>3</sup>. Secondary prevention of stroke is currently inadequate with incidence rates as high as 40%<sup>4</sup>. Secondary strokes tend to be more severe with a mortality rate nearly double that of first stroke<sup>5</sup>. Effective secondary prevention strategies must be significantly improved to prevent the impact of stroke recurrence.

Lifestyle interventions which involve increasing physical activity in stroke survivors can improve secondary stroke risk factors<sup>6 7</sup>. Despite this, stroke survivors frequently have low activity levels<sup>8-10</sup>. Simply providing prompts and encouragement is not sufficient to achieve increases in physical activity in stroke survivors<sup>9</sup>. Supervised exercise has the potential to facilitate secondary stroke prevention as it is superior to unsupervised exercise in increasing long-term physical activity levels in stroke survivors<sup>11</sup>. Stroke survivors have identified that support provided by qualified staff during supervised exercise was a key facilitator for increasing physical activity<sup>12</sup>. Supervised exercise also improves walking ability<sup>13</sup>, mobility<sup>14</sup>, balance<sup>14</sup> and endurance<sup>14</sup> in stroke survivors; all key elements of physical function which are positively associated with physical activity levels in this population<sup>15</sup>.

Barriers to physical activity identified by stroke survivors include transport<sup>16 17</sup>, economic constraints<sup>16</sup>, distance<sup>17</sup> and a perceived lack of appropriate services<sup>16</sup>. Marzolini, et al. (2016) found that barriers to physical activity identified in their study also increased with increased socioeconomic disadvantage<sup>17</sup>. Telehealth uses “telecommunications and virtual technology to

1  
2  
3 deliver health care outside of traditional health-care facilities<sup>18</sup>. This rapidly evolving mode of  
4 service delivery has significant potential to improve equity of service delivery and overcome  
5 barriers such as access, distance, cost and transport. Evidence is emerging across chronic  
6 conditions regarding the application of supervised exercise delivered via telehealth<sup>19-24</sup>.  
7 Preliminary research indicates these interventions may be feasible<sup>21</sup>, improve self-efficacy<sup>20</sup> and  
8 reduce costs of exercise program delivery<sup>24</sup>.  
9

10  
11  
12 Stroke related impairment may impact the safety and efficacy of supervised exercise delivered via  
13 telehealth to reduce secondary stroke risk factors. Stroke survivors are commonly affected by  
14 impaired cognition<sup>25</sup>, physical ability<sup>26 27</sup> and post stroke fatigue<sup>28</sup>. Internationally, the potential for  
15 supervised exercise to optimise stroke survivor safety is recognised. The American *Physical*  
16 *activity and exercise recommendations for stroke survivors*<sup>29</sup> and the *Canadian stroke best practice*  
17 *recommendations: Secondary prevention of stroke*<sup>30</sup> suggest the consideration of health  
18 professional supervised exercise where co-morbidity<sup>29 30</sup>, falls risk<sup>30</sup> and level of disability<sup>29</sup>  
19 present a risk. Seventy-nine percent of stroke survivors are reported to have at least one  
20 cardiovascular co-morbidity, while over a quarter have at least two<sup>31</sup>. Falls are common post  
21 stroke<sup>32-34</sup> and 45% of community dwelling stroke survivors have been found to fall at least once in  
22 a twelve month period<sup>34</sup>. Opportunity for effective, accessible health professional supervised  
23 exercise may facilitate safe access to physical activity for those at risk of falls or cardiac events.  
24 Preliminary evidence has found telehealth rehabilitation for improving motor function in stroke is  
25 at least as effective as its centre-based equivalent<sup>35</sup>. However, the safety and efficacy of supervised  
26 exercise training for the reduction of secondary stroke risk factors (including aerobic and  
27  
28  
29  
30  
31  
32  
33  
34  
35  
36  
37  
38  
39  
40  
41  
42  
43  
44  
45  
46  
47  
48  
49  
50  
51  
52  
53  
54  
55  
56  
57

1  
2  
3 resistance training) delivered via telehealth and measures required to optimise its safety remains  
4 largely unexplored<sup>35</sup>.  
5  
6  
7  
8  
9

10 Our scoping review will map the available evidence surrounding supervised exercise delivered via  
11 telehealth in chronic conditions. This will provide an understanding of current evidence to inform  
12 clinical trials in stroke. Our specific research questions are:  
13  
14  
15

16 With regards to interventions involving supervised exercise delivered via telehealth:  
17  
18

- 19 1. What population groups have been included in the research?
- 20 2. What are the key characteristics of the interventions delivered (including frequency,  
21 duration and intensity of exercise sessions, length of programs, types of exercise included,  
22 telehealth modalities used)?  
23  
24  
25  
26  
27
- 28 3. What are health professionals', participants' and carers' experiences of, or attitudes  
29 towards telehealth-supervised exercise interventions?  
30  
31  
32
- 33 4. What strategies have been used to optimise safety, feasibility, delivery and adherence?  
34  
35
- 36 5. What are the barriers and limitations to these interventions and what strategies have been  
37 used to mitigate these?  
38  
39
- 40 6. What is the effectiveness and cost-effectiveness of telehealth-supervised exercise sessions for  
41 reducing secondary stroke risk factors?  
42  
43  
44  
45  
46  
47  
48

## 49 **Methods and analysis:**

50  
51 Scoping reviews enable the mapping of research findings and identification of gaps in research  
52 evidence while providing a source of knowledge translation<sup>36-38</sup>. We have chosen the scoping  
53  
54  
55  
56  
57

1  
2  
3 review method to evaluate the evidence surrounding supervised exercise delivered via telehealth in  
4 chronic conditions because scoping reviews are suited to areas of research where outcomes are not  
5 well established<sup>37</sup> or are heterogeneous in nature<sup>38</sup>. We will use the framework of scoping reviews  
6 first described by Arksey and O'Malley (2005)<sup>36</sup> which requires *identifying the research question;*  
7 *identifying relevant studies; study selection; charting of the data; and collating, summarizing and*  
8 *reporting the results.* The refinements to the Arksey and O'Malley (2005)<sup>36</sup> framework suggested  
9 by Levac, et al. (2010)<sup>37</sup> and Peters, et al. (2015)<sup>39</sup> will also be considered to optimise transparency  
10 and methodological rigor.

11 To optimise reporting this scoping review protocol uses the Preferred Reporting Items for  
12 Systematic Review and Meta-analysis Protocols (PRISMA-P) method<sup>40</sup>. Where items in the  
13 PRISMA-P are not relevant to scoping reviews, we have adapted the items with reference to the  
14 Preferred Reporting Items for Systematic Review and Meta-analysis extension for Scoping  
15 Reviews (PRISMA-ScR)<sup>38</sup>.

### 16 ***Identifying the research question***

17 The six research questions of our review are identified in the introduction of this paper. These  
18 questions will inform future research into supervised exercise in stroke survivors by mapping and  
19 identifying gaps in the available evidence regarding supervised exercise delivered via telehealth in  
20 chronic conditions.

21 We define the key terms of the scoping review's questions as follows:

- 22 - *Supervision:* real-time monitoring (visual, or through other continuous physiologic  
23 monitoring such as echocardiogram or heart rate) by a health professional with the

opportunity for participants to receive and provide health professionals feedback in real time to ensure the exercise is being carried out safely and correctly.

- *Exercise*: our review will consider exercise as physical activity targeted at reducing outcomes that impact cardiovascular disease (and secondary stroke) risk factors, including hypertension, hyperlipidemia, dysglycemia or daily physical activity. To ensure our review captures all evidence relating to the research question regarding the safety of supervised exercise delivered via telehealth and its implications for falls risk, the definition of exercise will also include any intervention involving lower limb weight bearing, for example balance training.
- *Telehealth*: The application of telecommunications and virtual technology to provide health care outside of conventional health-care facilities (WHO, 2018)<sup>18</sup>.

### ***Identifying relevant studies***

Studies will be included in the review if they meet the eligibility requirements set out in Box 1. All published primary research studies will be included in the review. In order to accurately capture current approaches to real-time supervised exercise delivered via telehealth in this rapidly evolving field, we will also include published trial protocols and abstracts of unpublished studies for which authors can be contacted to provide sufficient information.

#### Box 1

|                     | <b>Inclusion</b>                                                                                 | <b>Exclusion</b>                                                                                                    |
|---------------------|--------------------------------------------------------------------------------------------------|---------------------------------------------------------------------------------------------------------------------|
| <b>Population</b>   | Chronic health condition<br>18 years and older                                                   | Healthy subjects (including those with a BMI less than 30)                                                          |
| <b>Intervention</b> | Supervised exercise delivered via telehealth where:<br><br>- The majority of supervised exercise | Exercise delivered to participants located onsite at a health-care facility<br><br>Exercise occurring with a health |

|                  |                                                                                                                                                                                                                                                                                                                                                                                                                                                                                        |                                                                                                                                                                                         |
|------------------|----------------------------------------------------------------------------------------------------------------------------------------------------------------------------------------------------------------------------------------------------------------------------------------------------------------------------------------------------------------------------------------------------------------------------------------------------------------------------------------|-----------------------------------------------------------------------------------------------------------------------------------------------------------------------------------------|
|                  | <p>is delivered via telehealth and this supervision involves observation in real-time (visual, or via other continuous physiologic monitoring)</p> <ul style="list-style-type: none"> <li>- The exercise sessions provide opportunity for participant and health professional feedback to ensure exercises are carried out correctly and safely</li> <li>- Exercise that impacts or is intended to impact cardiovascular disease risk or involves lower limb weight bearing</li> </ul> | <p>professional present at the participant's site (eg expert remotely supervising novice health professional on telehealth)</p> <p>Exercise not supervised by a health professional</p> |
| Comparison       | Any                                                                                                                                                                                                                                                                                                                                                                                                                                                                                    | Nil exclusion criteria                                                                                                                                                                  |
| Outcome          | All                                                                                                                                                                                                                                                                                                                                                                                                                                                                                    | Nil exclusion criteria                                                                                                                                                                  |
| Publication Type | <p>Published primary research studies, including both qualitative and quantitative research</p> <p>Primary research protocols which have been published</p> <p>Abstracts of unpublished studies for which authors can be contacted and provide sufficient information to enable accurate analysis</p>                                                                                                                                                                                  | <p>Text</p> <p>Opinion papers</p> <p>Letters</p> <p>Literature reviews</p> <p>Systematic reviews</p> <p>Meta-analyses</p> <p>Not published in English</p>                               |

### ***Study Selection***

We will conduct a comprehensive, systematic search of Medline, CINAHL, Scopus, Cochrane, Pedro and Embase databases. The search strategy will be developed in consultation with a senior research librarian and will include use of the relevant index terms and key words for 'exercise' and 'telehealth'. We will hand search the reference lists of all included studies as well as relevant systematic reviews. Experts in the field will also be contacted to identify any other pertinent

1  
2  
3 research. We will contact authors of abstracts of unpublished studies retrieved and request they  
4  
5 provide information to enable accurate analysis of their research.  
6  
7  
8  
9

10 Full details of the databases' draft search strategies are shown in Appendix 1.  
11  
12  
13

14 Studies identified through the search strategy will be exported from each database to EndNote  
15 X8.2 and then exported to Covidence for removal of duplicates and screening of titles and  
16  
17 abstracts. All titles and abstracts will be independently reviewed by two authors and conflicts will  
18  
19 be resolved by a third author. To optimise the reliability of screening of titles and abstracts all  
20  
21 authors will participate in the screening of the initial 150 studies for inclusion using the selection  
22  
23 criteria (outlined in Box 1). The authors will then then meet to resolve any issues or ambiguities  
24  
25 found in the criteria. Following title and abstract screening, full texts of potentially relevant studies  
26  
27 will be assessed for eligibility by two authors independently, with any discrepancies resolved by a  
28  
29 third author. To support the inherently iterative nature of scoping reviews<sup>36-39</sup> authors will meet  
30  
31 regularly to discuss the selection process. Any refinements made to the selection criteria will be  
32  
33 recorded. The selection process will be reported using a PRISMA 2009 Flow diagram<sup>41</sup>.  
34  
35  
36  
37  
38  
39  
40  
41

### 42 ***Data charting***

43  
44 Data charting is the method used for extracting data in scoping reviews<sup>36 38</sup>. It allows researchers to  
45  
46 capture a breadth of information including detail on processes to provide further context to the  
47  
48 research outcomes<sup>36</sup>. We will use a standardized electronic form to chart the data developed by the  
49  
50 authors. All authors will pilot data charting with the initial 5 studies and will then meet to discuss  
51  
52 and resolve any issues or discrepancies that arise. This process will also facilitate the reliability of  
53  
54  
55  
56  
57



1  
2  
3 the data charting. The remainder of the data will be charted by one author and checked by a second  
4 author. Any discrepancies will be resolved by a third author. The iterative nature of scoping  
5 reviews means the data charting form may require adaptation during the data charting process<sup>36-39</sup>.  
6  
7  
8 Regular communication between authors will occur to identify, in a timely manner, any need for  
9  
10  
11  
12  
13  
14  
15  
16  
17  
18  
19  
20  
21  
22  
23  
24  
25  
26  
27  
28  
29  
30  
31  
32  
33  
34  
35  
36  
37  
38  
39  
40  
41  
42  
43  
44  
45  
46  
47  
48  
49  
50  
51  
52  
53  
54  
55  
56  
57

To avoid inclusion of duplicate data we will identify and group multiple publications relating to  
the one research project prior to the charting of the data. The study details and outcomes chosen for  
charting are guided by The Cochrane Collaboration's *Checklist of items to consider in data  
collection or data extraction*<sup>42</sup> and the recommendation of Arskey and O'Malley (2005)<sup>36</sup>. Where  
available these will include, but are not limited to: bibliographic information; study aims/purpose;  
research design; number of participants; duration of intervention and follow-up; date; setting;  
country; co-morbidity, socio-demographics; and specific category of chronic condition. Where  
available the intervention data extracted will include frequency, intensity, time and type of exercise  
intervention and any control or comparison groups; the number of intervention groups; the type of  
telehealth modality used; adherence; satisfaction; and other methods of exercise delivery or  
support used in the study. All reported outcome measurements will be charted. Details of outcomes  
which directly inform the research questions including economic viability, intervention feasibility,  
intervention safety (including adverse events), cardiovascular risk factor indicators (including  
blood pressure, level of physical activity, cholesterol, lipid profiles, insulin resistance) will be  
prioritised. Any other key findings or recommendations not captured through the above process  
which specifically relate to our research questions will also be charted.

1  
2  
3 We will use *The Cochrane Collaboration's tool for assessing risk of bias*<sup>42</sup> to assess the bias of  
4 each individual, quantitative study. We will use the *Consolidated Criteria for Reporting*  
5 *Qualitative Research* (COREQ) checklist<sup>43</sup> and the *Mixed Methods Appraisal Tool (MMAT) –*  
6 *Version 2011*<sup>44 45</sup> to individually assess qualitative and mixed methods studies for methodological  
7 rigor respectively. This critical appraisal will be carried out by two independent authors who will  
8 meet to discuss and resolve any discrepancies found in their assessments, with adjudication by a  
9 third author if necessary.  
10  
11  
12  
13  
14  
15  
16  
17  
18  
19  
20  
21

### 22 ***Collating summarising and reporting of results***

23  
24 Our scoping review will be reported using the PRISMA-ScR<sup>38</sup>. The results will be summarised and  
25 reported to prioritise the findings relevant to the specific research questions. Quantitative data and  
26 the results of individual studies' critical appraisal will be presented in tabular format. Qualitative  
27 data will be analysed thematically and collated concisely into a tabular format. If needed, further  
28 narrative description will be provided to aid interpretation of the results. Visual or diagrammatic  
29 representation of data will occur to aid its summary or conceptualization as needed.  
30  
31  
32  
33  
34  
35  
36  
37  
38  
39

40 To aid the synthesis of the results we will provide a narrative summary of the findings most  
41 pertinent to the review's research questions. Knowledge gaps in the research evidence and their  
42 implications will also be recognized through a narrative summary. Our key findings, informed by  
43 the critical appraisal of individual studies will be used to make recommendations for future  
44 research and practice relating to supervised exercise delivered via telehealth. Limitations of the  
45 scoping review will also be acknowledged.  
46  
47  
48  
49  
50  
51  
52  
53  
54  
55  
56  
57

### **Ethics and dissemination:**

The findings of our scoping review will be disseminated through presentation at appropriate forums or conferences. The completed scoping review will also be submitted for publication in a peer reviewed journal and form part of a PhD thesis. Findings will be directly translated to inform the development of a supervised exercise program delivered via telehealth that will be pilot tested and evaluated in terms of effect on reducing secondary stroke risk factors. We will use only secondary de-identified data in the scoping review, therefore ethics approval is not required.

### **Discussion**

The high mortality rates and the significant burden of disease resulting from secondary stroke must be addressed. Our review will explore emerging research in relation to the efficacy, acceptability, safety, economics and feasibility of supervised exercise delivered via telehealth. This research has the potential to provide strategies to overcome current barriers in the translation of evidence for physical activity in stroke survivors to reduce stroke recurrence.

This review will significantly contribute to the knowledge base of exercise and rehabilitation delivered via telehealth. The breadth of research captured means it has implications beyond stroke care to broadly inform the application of supervised exercise and rehabilitation via telehealth. It is anticipated that our findings will be relevant to researchers, healthcare workers and policy makers at a national and international level.

**Author Statement:**

All authors made significant intellectual contributions to the protocol. CE conceived the idea for the scoping review. ERR (guarantor) and CE conceptualised and drafted the research questions and study selection criteria, while CMS, EAL, NAF and AP contributed to their further development. ERR developed the study methodology with EAL, CMS, NAF, AP and CE providing feedback for refinement. All authors contributed to the drafting and editing, and approved the final manuscript.

For peer review only

## References

1. World Health Organization. Health statistics and information systems: Disease burden and mortality estimates, cause-specific mortality 2000-2016 [Internet]. World Health Organization; 2018 [cited 2018 September 19]. 2018:[Available from: [http://www.who.int/healthinfo/global\\_burden\\_disease/estimates/en/](http://www.who.int/healthinfo/global_burden_disease/estimates/en/) accessed September 19 2018.
2. World Health Organisation. Health statistics and information systems: Disease burden and mortality estimates, Disease burden 2000-2016 [Internet]. World Health Organization; 2018 [updated 14/10/2018; cited 2018 September 19]. June 2018:[Available from: [http://www.who.int/healthinfo/global\\_burden\\_disease/estimates/en/index1.html](http://www.who.int/healthinfo/global_burden_disease/estimates/en/index1.html) accessed Septemeber 19 2018.
3. Feigin VL, Forouzanfar MH, Krishnamurthi R, et al. Global and regional burden of stroke during 1990–2010: findings from the Global Burden of Disease Study 2010. *Lancet* 2014;383(9913):245-54.
4. Hankey GJ. Secondary stroke prevention. *The Lancet Neurology* 2014;13(2):178-94. doi: [https://dx.doi.org/10.1016/S1474-4422\(13\)70255-2](https://dx.doi.org/10.1016/S1474-4422(13)70255-2)
5. Jorgensen HS, Nakayama H, Reith J, et al. Stroke recurrence: predictors, severity, and prognosis. The Copenhagen Stroke Study. *Neurology* 1997;48(4):891-5.
6. Deijle IA, Van Schaik SM, Van Wegen EEH, et al. Lifestyle Interventions to Prevent Cardiovascular Events After Stroke and Transient Ischemic Attack: Systematic Review and Meta-Analysis. *Stroke* 2017;48(1):174-79. doi: <https://dx.doi.org/10.1161/STROKEAHA.116.013794>
7. D'Isabella NT, Shkredova DA, Richardson JA, et al. Effects of exercise on cardiovascular risk factors following stroke or transient ischemic attack: a systematic review and meta-analysis. *Clin Rehabil* 2017;31(12):1561-72. doi: <https://dx.doi.org/10.1177/0269215517709051>
8. English C, Healy GN, Coates A, et al. Sitting and Activity Time in People With Stroke. *Phys Ther* 2016;96(2):193-201. doi: <https://dx.doi.org/10.2522/ptj.20140522>
9. Boysen G, Krarup L-H, Zeng X, et al. ExStroke Pilot Trial of the effect of repeated instructions to improve physical activity after ischaemic stroke: a multinational randomised controlled clinical trial. *BMJ (Clinical research ed)* 2009;339:b2810. doi: <https://dx.doi.org/10.1136/bmj.b2810>
10. Fini NA, Holland AE, Keating J, et al. How Physically Active Are People Following Stroke? Systematic Review and Quantitative Synthesis. *Phys Ther* 2017;97(7):707-17. doi: 10.1093/ptj/pzx038 [published Online First: 2017/04/27]
11. Olney SJ, Nymark J, Brouwer B, et al. A randomized controlled trial of supervised versus unsupervised exercise programs for ambulatory stroke survivors. *Stroke* 2006;37(2):476-81.
12. Simpson LA, Eng JJ, Tawashy AE. Exercise perceptions among people with stroke: Barriers and facilitators to participation. *Int J Ther Rehabil* 2011;18(9):520-30. [published Online First: 2011/09/06]
13. English C, Hillier SL, Lynch EA. Circuit class therapy for improving mobility after stroke. *The Cochrane database of systematic reviews* 2017;6:CD007513. doi: <https://dx.doi.org/10.1002/14651858.CD007513.pub3>
14. Duncan P, Studenski S, Richards L, et al. Randomized clinical trial of therapeutic exercise in subacute stroke. *Stroke* 2003;34(9):2173-80.

15. Thilarajah S, Mentiplay BF, Bower KJ, et al. Factors Associated With Post-Stroke Physical Activity: A Systematic Review and Meta-Analysis. *Arch Phys Med Rehabil* 2018;99(9):1876-89. doi: 10.1016/j.apmr.2017.09.117 [published Online First: 2017/10/24]
16. Nicholson SL, Donaghy M, Johnston M, et al. A qualitative theory guided analysis of stroke survivors' perceived barriers and facilitators to physical activity. *Disabil Rehabil* 2014;36(22):1857-68. doi: <https://dx.doi.org/10.3109/09638288.2013.874506>
17. Marzolini S, Balitsky A, Jagroop D, et al. Factors Affecting Attendance at an Adapted Cardiac Rehabilitation Exercise Program for Individuals with Mobility Deficits Poststroke. *Journal of stroke and cerebrovascular diseases : the official journal of National Stroke Association* 2016;25(1):87-94. doi: <https://dx.doi.org/10.1016/j.jstrokecerebrovasdis.2015.08.039>
18. World Health Organisation. Health and sustainable development: Telehealth [Internet]. World Health Organization; ND [cited 2018 September 19]. Available from: <http://www.who.int/sustainable-development/health-sector/strategies/telehealth/en/> accessed September 19 2018.
19. van Egmond MA, van der Schaaf M, Vredeveld T, et al. Effectiveness of physiotherapy with telerehabilitation in surgical patients: a systematic review and meta-analysis. *Physiotherapy* 2018;104(3):277-98. doi: <https://dx.doi.org/10.1016/j.physio.2018.04.004>
20. Tsai LLY, McNamara RJ, Moddel C, et al. Home-based telerehabilitation via real-time videoconferencing improves endurance exercise capacity in patients with COPD: The randomized controlled TeleR Study. *Respirology (Carlton, Vic)* 2017;22(4):699-707. doi: <https://dx.doi.org/10.1111/resp.12966>
21. Paneroni M, Colombo F, Papalia A, et al. Is Telerehabilitation a Safe and Viable Option for Patients with COPD? A Feasibility Study. *Copd* 2015;12(2):217-25. doi: <https://dx.doi.org/10.3109/15412555.2014.933794>
22. Hwang R, Bruning J, Morris N, et al. A Systematic Review of the Effects of Telerehabilitation in Patients With Cardiopulmonary Diseases. *J Cardiopulm Rehabil Prev* 2015;35(6):380-9. doi: <https://dx.doi.org/10.1097/HCR.000000000000121>
23. Clark RA, Conway A, Poulsen V, et al. Alternative models of cardiac rehabilitation: a systematic review. *Eur J Prev Cardiol* 2015;22(1):35-74. doi: <https://dx.doi.org/10.1177/2047487313501093>
24. Maddison R, Rawstorn JC, Stewart RAH, et al. Effects and costs of real-time cardiac telerehabilitation: randomised controlled non-inferiority trial. *Heart (British Cardiac Society)* 2018 doi: <https://dx.doi.org/10.1136/heartjnl-2018-313189>
25. Douiri A, Rudd AG, Wolfe CD. Prevalence of poststroke cognitive impairment: South London Stroke Register 1995-2010. *Stroke* 2013;44(1):138-45. doi: 10.1161/strokeaha.112.670844 [published Online First: 2012/11/15]
26. Blennerhassett JM, Levy CE, Mackintosh A, et al. One-Quarter of People Leave Inpatient Stroke Rehabilitation with Physical Capacity for Community Ambulation. *Journal of stroke and cerebrovascular diseases : the official journal of National Stroke Association* 2018 doi: <https://dx.doi.org/10.1016/j.jstrokecerebrovasdis.2018.08.004>
27. Deloitte Access Economics. The economic impact of stroke in Australia. 2013 [published Online First: 13.03.2013]
28. Nadarajah M, Goh HT. Post-stroke fatigue: a review on prevalence, correlates, measurement, and management. *Top Stroke Rehabil* 2015;22(3):208-20. doi: 10.1179/1074935714z.0000000015 [published Online First: 2015/03/18]

- 1  
2  
3  
4 29. Billinger SA, Arena R, Bernhardt J, et al. Physical activity and exercise recommendations for  
5 stroke survivors: a statement for healthcare professionals from the American Heart  
6 Association/American Stroke Association. *Stroke* 2014;45(8):2532-53. doi:  
7 10.1161/str.0000000000000022 [published Online First: 2014/05/23]
- 8 30. Wein T, Lindsay MP, Cote R, et al. Canadian stroke best practice recommendations:  
9 Secondary prevention of stroke, sixth edition practice guidelines, update 2017.  
10 *International journal of stroke : official journal of the International Stroke Society*  
11 2018;13(4):420-43. doi: <https://dx.doi.org/10.1177/1747493017743062>
- 12 31. Jorgensen L, Engstad T, Jacobsen BK. Higher incidence of falls in long-term stroke survivors  
13 than in population controls: depressive symptoms predict falls after stroke. *Stroke*  
14 2002;33(2):542-7. [published Online First: 2002/02/02]
- 15 32. Tilson JK, Wu SS, Cen SY, et al. Characterizing and identifying risk for falls in the LEAPS  
16 study: a randomized clinical trial of interventions to improve walking poststroke. *Stroke*  
17 2012;43(2):446-52. doi: 10.1161/strokeaha.111.636258 [published Online First:  
18 2012/01/17]
- 19 33. Weerdesteyn V, de Niet M, van Duijnhoven HJ, et al. Falls in individuals with stroke. *J*  
20 *Rehabil Res Dev* 2008;45(8):1195-213. [published Online First: 2009/02/24]
- 21 34. Wada N, Sohmiya M, Shimizu T, et al. Clinical analysis of risk factors for falls in home-living  
22 stroke patients using functional evaluation tools. *Arch Phys Med Rehabil*  
23 2007;88(12):1601-5. doi: 10.1016/j.apmr.2007.09.005 [published Online First: 2007/12/01]
- 24 35. Sarfo FS, Ulasavets U, Opare-Sem OK, et al. Tele-Rehabilitation after Stroke: An Updated  
25 Systematic Review of the Literature. *Journal of stroke and cerebrovascular diseases : the*  
26 *official journal of National Stroke Association* 2018;27(9):2306-18. doi:  
27 <https://dx.doi.org/10.1016/j.jstrokecerebrovasdis.2018.05.013>
- 28 36. Arksey H, O'Malley L. Scoping studies: Towards a methodological framework. *Int J Soc Res*  
29 *Methodol: Theory Pract* 2005;8(1):19-32. doi: 10.1080/1364557032000119616
- 30 37. Levac D, Colquhoun H, O'Brien KK. Scoping studies: advancing the methodology.  
31 *Implementation science : IS* 2010;5:69. doi: <https://dx.doi.org/10.1186/1748-5908-5-69>
- 32 38. Tricco AC, Lillie E, Zarin W, et al. PRISMA Extension for Scoping Reviews (PRISMA-ScR):  
33 Checklist and Explanation. *Ann Intern Med* 2018 doi: <https://dx.doi.org/10.7326/M18-0850>
- 34 39. Peters MDJ, Godfrey CM, Khalil H, et al. Guidance for conducting systematic scoping  
35 reviews. *International journal of evidence-based healthcare* 2015;13(3):141-6. doi:  
36 <https://dx.doi.org/10.1097/XEB.0000000000000050>
- 37 40. Moher D, Shamseer L, Clarke M, et al. Preferred reporting items for systematic review and  
38 meta-analysis protocols (PRISMA-P) 2015 statement. *Syst Rev* 2015;4:1. doi:  
39 10.1186/2046-4053-4-1 [published Online First: 2015/01/03]
- 40 41. Moher D, Liberati A, Tetzlaff J, et al. Preferred reporting items for systematic reviews and  
41 meta-analyses: the PRISMA statement. *Bmj* 2009;339:b2535. doi: 10.1136/bmj.b2535  
42 [published Online First: 2009/07/23]
- 43 42. Higgins J, (Eds) GS. Cochrane Handbook for Systematic Reviews of Interventions Version  
44 5.1.0 *The Cochrane Collaboration* 2011
- 45 43. Tong A, Sainsbury P, Craig J. Consolidated criteria for reporting qualitative research  
46 (COREQ): a 32-item checklist for interviews and focus groups. *International journal for*  
47 *quality in health care : journal of the International Society for Quality in Health Care*  
48 2007;19(6):349-57. doi: 10.1093/intqhc/mzm042 [published Online First: 2007/09/18]
- 49  
50  
51  
52  
53  
54  
55  
56  
57

- 1  
2  
3  
4  
5  
6  
7  
8  
9  
10  
11  
12  
13  
14  
15  
16  
17  
18  
19  
20  
21  
22  
23  
24  
25  
26  
27  
28  
29  
30  
31  
32  
33  
34  
35  
36  
37  
38  
39  
40  
41  
42  
43  
44  
45  
46  
47  
48  
49  
50  
51  
52  
53  
54  
55  
56  
57
44. Pluye P, Robert E, Cargo M, et al. Proposal: A mixed methods appraisal tool for systematic mixed studies reviews <http://mixedmethodsappraisaltoolpublic.pbworks.com/>. Archived by WebCite ® at <http://www.webcitation.org/5tTRTc9yJ2011> [cited 2018 October 22]. accessed October 22 2018.
45. Pluye P, Gagnon MP, Griffiths F, et al. A scoring system for appraising mixed methods research, and concomitantly appraising qualitative, quantitative and mixed methods primary studies in Mixed Studies Reviews. *Int J Nurs Stud* 2009;46(4):529-46. doi: 10.1016/j.ijnurstu.2009.01.009 [published Online First: 2009/02/24]

For peer review only



## Appendix 1: DRAFT search strategy

### Medline

- #1 exp Telemedicine/  
 #2 exp VIDEOCONFERENCING/  
 #3 exp Remote Consultation/  
 #4 (ehealth\* or e-health\* or e health\* or electronic-health\* or electronic health\* or mhealth\* or m-health\* or m health\* or mobile health\* or mobile-health\* or emedic\* or e-medic\* or e medic\* or electronic-medic\* or electronic-medic\*).mp.  
 #5 (videoconferenc\* or video-conferenc\* or video conferenc\* or teleconsult\* or teleconsult\* or tele consult\* or teleconferenc\* or tele-conferenc\* or tele conferenc\* or videoconsult\* or video-consult\* or video consult\*).mp.  
 #6 (interactive adj ((health adj communicat\*) or video\* or technolog\* or multimedia)).mp.  
 #7 ((digital health or digital) adj intervention\*).mp.  
 #8 (telehealth\* or tele-health\* or tele health or telemedic\* or tele-medic\* or telemedic\* or telerehab\* or tele-rehab\* or tele rehab\* or teleconsult\* or teleconsult\* or tele consult\* or telemonitor\* or tele-monitor\* or tele monitor\*).mp.  
 #9 1 or 2 or 3 or 4 or 5 or 6 or 7 or 8  
 #10 exp EXERCISE/  
 #11 exp Exercise Therapy/  
 #12 exp REHABILITATION/  
 #13 (physiotherap\* or physical therap\* or physical activ\* or physical train\* or physical condition\* or exercis\* or rehab\* or exercise therap\* or exercise train\*).mp.  
 #14 10 or 11 or 12 or 13  
 #15 9 and 14

### CINAHL

- S13 S11 AND S12  
 S12 S1 OR S2 OR S3  
 S11 S4 OR S5 OR S6 OR S7 OR S8 OR S9 OR S10

- 1  
2  
3 S10 ((digital health or digital) adj intervention\*)  
4  
5 S9 (interactive adj ((health adj communicat\*) or video\* or technolog\* or  
6 multimedia))  
7  
8 "videoconferenc\*" or "video-conferenc\*" or "video conferenc\*" or "teleconsult\*"  
9 S8 or "tele-consult\*" or "tele consult\*" or "teleconferenc\*" or "tele-conferenc\*" or  
10 "tele conferenc\*" or "videoconsult\*" or "video-consult\*" or "video consult\*"  
11  
12 "ehealth\*" or "e-health\*" or "e health\*" or "electronic-health\*" or "electronic  
13 health\*" or "mhealth\*" or "m-health\*" or "m health\*" or "mobile health\*" or  
14 S7 "mobile-health\*" or "emedic\*" or "e-medic\*" or "e medic\*" or "electronic-  
15 medic\*" or "electronic-medic\*"  
16  
17 "telehealth\*" or "tele-health\*" or "tele health" or "telemedic\*" or "tele-medic\*"  
18 S6 or "telemedic\*" or "telerehab\*" or "tele-rehab\*" or "tele rehab\*" or "teleconsult\*"  
19 or "tele-consult\*" or "tele consult\*" or "telemonitor\*" or "tele-monitor\*" or "tele  
20 monitor\*"  
21  
22 S5 (MH "Videoconferencing+")  
23  
24 S4 (MH "Telehealth+")  
25  
26 "physiotherap\*" or "physical therap\*" or "physical activ\*" or "physical train\*" or  
27 S3 "physical condition\*" or "exercis\*" or "rehab\*" or "exercise therap\*" or "exercise  
28 train\*"  
29  
30 S2 (MH "Rehabilitation+")  
31  
32 S1 (MH "Exercise+")  
33  
34

### 35 Cochrane

- 36  
37 #1 MeSH descriptor: [Telemedicine] explode all trees  
38  
39 #2 MeSH descriptor: [Videoconferencing] this term only  
40  
41 #3 "videoconference" or "video-conference" or "video conference" or "teleconsultation" or  
42 "tele-consultation" or "tele consultation" or "teleconference" or "tele-conference" or "tele  
43 conference" or "videoconsultation" or "video-consultation" or "video consultation"  
44  
45 #4 "ehealth" or "e-health" or "e health" or "electronic-health" or "electronic health" or  
46 "mhealth" or "m-health" or "m health" or "mobile health" or "mobile-health" or  
47 "emedicine" or "e-medicine" or "e medicine" or "electronic-medicine" or "electronic-  
48 medicine"  
49  
50 #5 "telehealth" or "tele-health" or "tele health" or "telemedicine" or "tele-medicine" or  
51 "telemedicine" or "telerehabilitation" or "tele-rehabilitation" or "tele rehabilitation" or  
52 "teleconsultation" or "tele-consultation" or "tele consultation" or "telemonitor" or "tele-  
53 monitor" or "tele monitor"  
54  
55 #6 "digital health intervention" or "digital intervention"  
56  
57  
58  
59  
60

- 1  
2  
3 #7 "interactive video" or "interactive technology" or "interactive multimedia" or "interactive health"  
4  
5  
6 #8 #1 or #2 or #3 or #4 or #5 or #6 or #7  
7  
8 #9 MeSH descriptor: [Exercise] explode all trees  
9  
10 #10 MeSH descriptor: [Rehabilitation] explode all trees  
11  
12 #11 "physiotherapy" or "physical therapy" or "physical activity" or "physical training" or  
13 "physical conditioning" or "exercise" or "rehabilitation" or "rehab" or "exercise therapy"  
14  
15 #12 #9 or #10 or #11  
16  
17 # 13 #12 and #8  
18

### Embase

- 19  
20 #1 exp exercise/  
21  
22 #2 exp kinesiotherapy/  
23  
24 #3 exp rehabilitation patient/ or exp rehabilitation medicine/ or exp rehabilitation/ or exp  
25 stroke rehabilitation/ or exp athletic rehabilitation/ or exp pulmonary rehabilitation/ or exp  
26 community based rehabilitation/ or exp geriatric rehabilitation/ or exp rehabilitation  
27 center/ or exp heart rehabilitation/ or exp cancer rehabilitation/ or exp rehabilitation care/  
28 or exp rehabilitation nursing/  
29  
30  
31 #4 (physiotherap\* or physical therap\* or physical activ\* or physical train\* or physical  
32 condition\* or exercis\* or rehab\* or exercise therap\* or exercise train\*).mp.  
33  
34 #5 1 or 2 or 3 or 4  
35  
36 #6 exp telehealth/ or telemedicine/ or exp telerehabilitation/ or exp telemonitoring/ or exp  
37 teleconsultation/ or exp videoconferencing/  
38  
39 #7 (ehealth\* or e-health\* or e health\* or electronic-health\* or electronic health\* or mhealth\*  
40 or m-health\* or m health\* or mobile health\* or mobile-health\* or emedic\* or e-medic\* or  
41 e medic\* or electronic-medic\* or electronic-medic\*).mp.  
42  
43  
44 #8 (videoconferenc\* or video-conferenc\* or video conferenc\* or teleconsult\* or tele-consult\*  
45 or tele consult\* or teleconferenc\* or tele-conferenc\* or tele conferenc\* or videoconsult\*  
46 or video-consult\* or video consult\*).mp.  
47  
48 #9 (telehealth\* or tele-health\* or tele health or telemedic\* or tele-medic\* or telemedic\* or  
49 telerehab\* or tele-rehab\* or tele rehab\* or teleconsult\* or tele-consult\* or tele consult\* or  
50 telemonitor\* or tele-monitor\* or tele monitor\*).mp.  
51  
52 #10 ((digital health or digital) adj intervention\*).mp.  
53  
54 #11 (interactive adj ((health adj communicat\*) or video\* or technolog\* or multimedia)).mp.  
55  
56  
57  
58  
59  
60

1  
2  
3 #12 6 or 7 or 8 or 9 or 10 or 11  
4

5 #13 5 and 12  
6  
7

## 8 9 **Scopus**

10 (( TITLE-ABS-KEY ( "videoconference" OR "video-conference" OR "video  
11 conference" OR "teleconsultation" OR "tele-consultation" OR "tele  
12 consultation" OR "teleconference" OR "tele-conference" OR "tele  
13 conference" )) OR ( TITLE-ABS-KEY ( "videoconsultation" OR "video-  
14 consultation" OR "video consultation" OR "ehealth" OR "e-health" OR "e  
15 health" OR "electronic-health" OR "electronic health" OR "mhealth" OR "m-  
16 health" OR "m health" OR "mobile health" OR "mobile-health" )) OR ( TITLE-  
17 ABS-KEY ( "emedicine" OR "e-medicine" OR "e medicine" OR "electronic-  
18 medicine" OR "electronic-medicine" OR "telehealth" OR "tele-health" OR "tele  
19 health" )) OR ( TITLE-ABS-KEY ( "telemedicine" OR "tele-  
20 medicine" OR "telemedicine" OR "telerehabilitation" OR "tele-  
21 rehabilitation" OR "tele rehabilitation" OR "teleconsultation" OR "tele-  
22 consultation" OR "tele consultation" OR "telemonitor" OR "tele-monitor" OR "tele  
23 monitor" )) OR ( TITLE-ABS-KEY ( "digital health intervention" OR "digital  
24 intervention" )) OR ( TITLE-ABS-KEY ( "interactive video" OR "interactive  
25 technology" OR "interactive multimedia" OR "interactive  
26 health" )) ) AND ( TITLE-ABS-KEY ( "physiotherapy" OR "physical  
27 therapy" OR "physical activity" OR "physical training" OR "physical  
28 conditioning" OR "exercise" OR "rehabilitation" OR "rehab" OR "exercise  
29 therapy" OR "exercise training" )) )  
30  
31  
32  
33  
34

## 35 36 **Pedro**

37 Telerehab\* exercis\*  
38  
39  
40  
41  
42  
43  
44  
45  
46  
47  
48  
49  
50  
51  
52  
53  
54  
55  
56  
57  
58  
59  
60

# BMJ Open

## Supervised exercise delivered via telehealth in real-time to manage chronic conditions in adults: A protocol for a scoping review to inform future research in stroke survivors

|                                 |                                                                                                                                                                                                                                                                                                                                                                                                                                                                                                                                                                                                                                                                                              |
|---------------------------------|----------------------------------------------------------------------------------------------------------------------------------------------------------------------------------------------------------------------------------------------------------------------------------------------------------------------------------------------------------------------------------------------------------------------------------------------------------------------------------------------------------------------------------------------------------------------------------------------------------------------------------------------------------------------------------------------|
| Journal:                        | <i>BMJ Open</i>                                                                                                                                                                                                                                                                                                                                                                                                                                                                                                                                                                                                                                                                              |
| Manuscript ID                   | bmjopen-2018-027416.R1                                                                                                                                                                                                                                                                                                                                                                                                                                                                                                                                                                                                                                                                       |
| Article Type:                   | Protocol                                                                                                                                                                                                                                                                                                                                                                                                                                                                                                                                                                                                                                                                                     |
| Date Submitted by the Author:   | 13-Dec-2018                                                                                                                                                                                                                                                                                                                                                                                                                                                                                                                                                                                                                                                                                  |
| Complete List of Authors:       | Ramage, Emily; University of Newcastle, School of Health Sciences; Western Health, Physiotherapy<br>Fini, Natalie; University of Melbourne, School of Health Sciences , Physiotherapy; La Trobe University, Physiotherapy<br>Lynch, Elizabeth; University of Adelaide, Adelaide Nursing School<br>Patterson, Amanda; University of Newcastle, School of Health Sciences<br>Said, Catherine; Western Health, Physiotherapy; The University of Melbourne, Physiotherapy<br>English, Coralie; University of Newcastle, School of Health Sciences; Centre for Research Excellence in Stroke Recovery and Rehabilitation , Florey Institute of Neuroscience and Hunter Medical Research Institute |
| <b>Primary Subject Heading</b>: | Neurology                                                                                                                                                                                                                                                                                                                                                                                                                                                                                                                                                                                                                                                                                    |
| Secondary Subject Heading:      | Cardiovascular medicine, Rehabilitation medicine, Sports and exercise medicine                                                                                                                                                                                                                                                                                                                                                                                                                                                                                                                                                                                                               |
| Keywords:                       | Telehealth, Telerehabilitation, Supervised exercise, Physical activity, Secondary stroke, Stroke < NEUROLOGY                                                                                                                                                                                                                                                                                                                                                                                                                                                                                                                                                                                 |
|                                 |                                                                                                                                                                                                                                                                                                                                                                                                                                                                                                                                                                                                                                                                                              |

SCHOLARONE™  
Manuscripts

1  
2  
3 1 **Title:** Supervised exercise delivered via telehealth in real-time to manage chronic conditions  
4  
5 2 in adults: A protocol for a scoping review to inform future research in stroke survivors  
6  
7  
8 3

9  
10 4 **Authors:**

- 11  
12 5 1. Emily R. Ramage, BPhysio (Hons),  
13  
14 PhD Candidate, School of Health Sciences, University of Newcastle, Australia,  
15 6  
16 Department of Physiotherapy, Western Health, St Albans, Australia  
17 7  
18 Centre for Research Excellence in Stroke Recovery and Rehabilitation, Florey Institute  
19 8  
20 of Neuroscience and Hunter Medical Research Institute, Australia  
21  
22 Email: [emily.ramage@uon.edu.au](mailto:emily.ramage@uon.edu.au) Twitter: @EmilyRRamage  
23  
24 10  
25  
26 11 2. Natalie A. Fini, BPhysio (Hons), Grad Dip Rehab,  
27  
28 PhD Candidate, La Trobe University, Bundoora, Australia  
29 12  
30 Lecturer, Department of Physiotherapy, Melbourne School of Health Sciences,  
31 13  
32 the University of Melbourne, Australia  
33 14  
34 Email: [natalie.fini@unimelb.edu.au](mailto:natalie.fini@unimelb.edu.au) Twitter: @NatFiniPhysio  
35 15  
36  
37 16 3. Elizabeth A. Lynch, PhD  
38  
39 Research Fellow, Adelaide Nursing School, University of Adelaide  
40 17  
41  
42 Email: [elizabeth.lynch@adelaide.edu.au](mailto:elizabeth.lynch@adelaide.edu.au) Twitter: @E\_A\_Lynch  
43 18  
44  
45 19 4. Amanda Patterson, M Nutr & Diet, PhD  
46  
47 20 Senior Lecturer, School of Health Sciences and Priority Research Centre for Stroke and  
48  
49 Brain Injury, University of Newcastle, Australia  
50 21  
51  
52 Email: [amanda.patterson@newcastle.edu.au](mailto:amanda.patterson@newcastle.edu.au)  
53 22  
54  
55 23 5. Catherine M. Said, PhD  
56  
57 24 Associate Professor Physiotherapy, Western Health, St Albans, Australia  
58  
59 25 Physiotherapy, University of Melbourne, Parkville, Australia  
60

26 Australian Institute for Musculoskeletal Science, St Albans, Australia

27 Phone +61 3 8395 8106, email [csaid@unimelb.edu.au](mailto:csaid@unimelb.edu.au); Twitter @cathy\_said

28 6. Coralie English, PhD

29 Associate Professor, School of Health Sciences and Priority Research Centre for Stroke  
30 and Brain Injury, University of Newcastle, Callaghan, Australia

31 Centre for Research Excellence in Stroke Recovery and Rehabilitation, Florey Institute  
32 of Neuroscience and Hunter Medical Research Institute, Australia

33 Phone: +61 2 4913 8102 E-mail: [Coralie.english@newcastle.edu.au](mailto:Coralie.english@newcastle.edu.au) Twitter:  
34 @Coralie\_English

36 **Correspondence (for review):**

|             |                                                                      |
|-------------|----------------------------------------------------------------------|
| Name        | Emily Ramage                                                         |
| Department  | School of Health Sciences                                            |
| Institution | University of Newcastle                                              |
| Country     | Australia                                                            |
| Tel         | +61 408 669 204                                                      |
| Mob         | +61 408 669 204                                                      |
| Fax         |                                                                      |
| Email       | <a href="mailto:emily.ramage@uon.edu.au">emily.ramage@uon.edu.au</a> |

38 **Correspondence (for publication)**

|             |                                                   |
|-------------|---------------------------------------------------|
| Name        | Emily Ramage                                      |
| Department  | School of Health Sciences                         |
| Institution | University of Newcastle                           |
| Address     | University Drive, Callaghan, NSW, 2308, Australia |

|       |                         |
|-------|-------------------------|
| Email | emily.ramage@uon.edu.au |
|-------|-------------------------|

39

40 **Abbreviated title:** Supervised exercise delivered via telehealth: A scoping review protocol

41

42 **Key words:** Telehealth, telerehabilitation, supervised exercise, stroke, physical  
43 activity, secondary stroke, stroke recurrence

44

45 **Word Count:** 288 words (Abstract)  
46 2667 (Strengths and Limitations; Introduction; Methods and Analysis;  
47 Ethics and Dissemination; Discussion)

48 **References:** 48

49 **Box:** 1

50 **Tables:** Nil

51 **Figures:** Nil

52 **Appendices:** 2

53 **Ethics approval:** The review will utilise only secondary de-identified data and therefore  
54 ethics approval is not required

55

56 **Funding/Support:** Emily Ramage was supported by an Australian Government Research  
57 Training Program Scholarship. Associate Professor English was supported by a National Heart  
58 Foundation Future Leaders Fellowship (#101177). Dr Elizabeth Anne Lynch was supported by  
59 a National Health and Medical Research Council Early Career Research Fellowship  
60 (#1138515).

61



1  
2  
3 62 **Acknowledgements:** The authors would like to acknowledge the contribution of Ms Debbie  
4  
5 63 Booth, Senior Research Librarian at the University of Newcastle, for her assistance and advice  
6  
7  
8 64 in drafting the search strategy.  
9

10 65 **Competing interests:** ERR reports support from an Australian Government Research Training  
11  
12 66 Program Scholarship. CE reports support from the National Heart Foundation of Australia and  
13  
14  
15 67 EAL reports support from the National Health and Medical Research Council.  
16  
17  
18  
19  
20  
21  
22  
23  
24  
25  
26  
27  
28  
29  
30  
31  
32  
33  
34  
35  
36  
37  
38  
39  
40  
41  
42  
43  
44  
45  
46  
47  
48  
49  
50  
51  
52  
53  
54  
55  
56  
57  
58  
59  
60

For peer review only

1  
2  
3 69 **ABSTRACT**  
4  
5  
6 70  
7

8 71 **Introduction:** Increasing physical activity reduces secondary stroke risk factors, but many  
9  
10 72 stroke survivors have low levels of physical activity. Supervised exercise delivered via  
11  
12 73 telehealth has the potential to overcome barriers to increased physical activity in stroke  
13  
14 74 survivors. Our scoping review will examine the emerging field of supervised exercise delivered  
15  
16 75 via telehealth to map the available evidence in relation to its efficacy, acceptability, safety and  
17  
18 76 feasibility in chronic conditions to inform future research into its ability to increase physical  
19  
20 77 activity.  
21  
22  
23  
24 78

25  
26 79 **Methods and analysis:** The methodological framework of Arksey and O'Malley will be  
27  
28 80 applied to our scoping review. A systematic search of Medline, CINAHL, Scopus, Cochrane,  
29  
30 81 Pedro and Embase; hand searching of pertinent studies' reference lists; and consultation with  
31  
32 82 experts in the field will identify relevant papers. Studies involving participants with a chronic  
33  
34 83 condition who undertake supervised exercise delivered by a health professional via telehealth  
35  
36 84 targeted at improving secondary stroke risk factors or involving lower limb weight bearing  
37  
38 85 exercise will be included. Study selection and critical appraisal of individual studies will be  
39  
40 86 carried out independently by two authors with discrepancies resolved by a third author.  
41  
42 87 Quantitative and qualitative data will be charted using a standardized form. Results will be  
43  
44 88 tabulated and narratively summarized to highlight findings relevant to the review's research  
45  
46 89 questions and to inform recommendations for future research.  
47  
48  
49  
50  
51  
52  
53

54 91 **Ethics and dissemination:** Our review will significantly contribute to the knowledge base of  
55  
56 92 exercise and rehabilitation delivered via telehealth and its application in chronic conditions,  
57  
58 93 including stroke. Findings will be relevant to researchers, healthcare workers and policy makers  
59  
60

1  
2  
3 94 and will be disseminated through publication and presentations. Only secondary de-identified  
4  
5 95 data will be included, therefore ethics approval will not be sought.  
6

7  
8 96 This protocol is not registered as PROSPERO currently excludes scoping reviews.  
9

10 97 *Keywords:* Telehealth, telerehabilitation, supervised exercise, stroke, physical activity,  
11  
12 98 secondary stroke  
13  
14  
15  
16  
17  
18  
19  
20  
21  
22  
23  
24  
25  
26  
27  
28  
29  
30  
31  
32  
33  
34  
35  
36  
37  
38  
39  
40  
41  
42  
43  
44  
45  
46  
47  
48  
49  
50  
51  
52  
53  
54  
55  
56  
57  
58  
59  
60

For peer review only

1  
2  
3 100 **Strengths and limitations of this study:**  
4

- 5 101 • Our comprehensive scoping review will bring together research findings regarding  
6 102 supervised exercise delivered via telehealth to inform its future application to research  
7  
8 103 and practice across chronic conditions  
9  
10  
11  
12 104 • The inclusion of all research study designs will ensure the breadth of evidence  
13  
14 regarding supervised exercise delivered via telehealth is captured  
15 105  
16  
17 106 • We will use a published framework to optimise transparency and methodological rigour  
18  
19  
20 107 • To facilitate accurate analysis of the evidence and its role in informing future research,  
21  
22 108 quantitative studies will be individually assessed for bias and qualitative studies will be  
23  
24 109 individually assessed for methodological rigour  
25  
26 110 • A limitation of this review will be the exclusion of unpublished literature for which  
27  
28 authors are unable to provide sufficient additional information, and research not  
29 111 published in English.  
30  
31 112  
32  
33  
34  
35  
36  
37  
38  
39  
40  
41  
42  
43  
44  
45  
46  
47  
48  
49  
50  
51  
52  
53  
54  
55  
56  
57  
58  
59  
60

## 114 **Introduction**

115 Stroke is the second leading cause of death and burden of disease worldwide<sup>1 2</sup>. The number of  
116 people experiencing stroke is increasing, with estimates predicting 70 million stroke survivors  
117 and 12 million stroke related deaths worldwide in 2030<sup>3</sup>. Secondary prevention of stroke is  
118 currently inadequate with incidence rates as high as 40%<sup>4</sup>. Secondary strokes tend to be more  
119 severe with a mortality rate nearly double that of first stroke<sup>5</sup>. Effective secondary prevention  
120 strategies must be significantly improved to prevent the impact of stroke recurrence.

121  
122 Lifestyle interventions which involve increasing physical activity in stroke survivors can  
123 improve secondary stroke risk factors<sup>6 7</sup>. Despite this, stroke survivors frequently have low  
124 activity levels<sup>8-10</sup>. Simply providing prompts and encouragement is not sufficient to achieve  
125 increases in physical activity in stroke survivors<sup>9</sup>. The potential importance that *supervision of*  
126 exercise plays in increasing physical activity in stroke survivors is emerging in the evidence.  
127 Research has found supervised exercise is superior to unsupervised exercise in increasing long-  
128 term physical activity levels in stroke survivors<sup>11</sup>. Furthermore, stroke survivors have identified  
129 support provided by qualified staff during supervised exercise was a key facilitator for  
130 increasing physical activity<sup>12</sup>. Supervised exercise can also improve walking ability<sup>13</sup>,  
131 mobility<sup>14</sup>, balance<sup>14</sup> and endurance<sup>14</sup> in stroke survivors; all key elements of physical function  
132 which are positively associated with physical activity levels in this population<sup>15</sup>.

133  
134 Barriers to physical activity identified by stroke survivors include transport<sup>16 17</sup>, economic  
135 constraints<sup>16</sup>, distance<sup>17</sup> and a perceived lack of appropriate services<sup>16</sup>. Marzolini, et al. (2016)  
136 found barriers to physical activity identified in their study also increased with increased  
137 socioeconomic disadvantage<sup>17</sup>. Telehealth uses “telecommunications and virtual technology to  
138 deliver health care outside of traditional health-care facilities”<sup>18</sup>. This rapidly evolving mode of

1  
2  
3 139 service delivery has significant potential to improve equity of service delivery and overcome  
4  
5 140 barriers such as access, distance, cost and transport. Evidence is emerging across chronic  
6  
7 141 conditions regarding the application of supervised exercise delivered via telehealth<sup>19-24</sup>.  
8  
9  
10 142 Preliminary research indicates these interventions may be feasible<sup>21</sup>, improve self-efficacy<sup>20</sup>  
11  
12 143 and reduce costs of exercise program delivery<sup>24</sup>.  
13  
14  
15 144

16  
17 145 Stroke related impairment may impact the safety and efficacy of supervised exercise delivered  
18  
19 146 via telehealth to reduce secondary stroke risk factors. Stroke survivors are commonly affected  
20  
21 147 by impaired cognition<sup>25</sup>, physical ability<sup>26 27</sup> and post stroke fatigue<sup>28</sup>. Internationally, the  
22  
23 148 potential for supervised exercise to optimise stroke survivor safety is recognised. The  
24  
25 149 *American Physical activity and exercise recommendations for stroke survivors*<sup>29</sup> and the  
26  
27 150 *Canadian stroke best practice recommendations: Secondary prevention of stroke*<sup>30</sup> suggest the  
28  
29 151 consideration of health professional supervised exercise where co-morbidity<sup>29 30</sup>, falls risk<sup>30</sup> and  
30  
31 152 level of disability<sup>29</sup> present a risk. Seventy-nine percent of stroke survivors are reported to have  
32  
33 153 at least one cardiovascular co-morbidity, while over a quarter have at least two<sup>31</sup>. Falls are  
34  
35 154 common post stroke<sup>32-34</sup> and 45% of community dwelling stroke survivors have been found to  
36  
37 155 fall at least once in a twelve month period<sup>34</sup>. Supervised exercise delivered via telehealth may  
38  
39 156 provide a safe and accessible way to increase physical activity for stroke survivors at risk of  
40  
41 157 falls or cardiac events. Preliminary evidence has found telehealth rehabilitation for improving  
42  
43 158 motor function in stroke is at least as effective as its centre-based equivalent<sup>35</sup>. However, the  
44  
45 159 safety and efficacy of supervised exercise training for the reduction of secondary stroke risk  
46  
47 160 factors (including aerobic and resistance training) delivered via telehealth remains largely  
48  
49 161 unexplored<sup>35</sup>.  
50  
51  
52  
53  
54  
55  
56  
57  
58  
59  
60

1  
2  
3 163 Focusing on supervised exercise due to its significant potential to support increased physical  
4  
5 164 activity in stroke survivors, our scoping review will map the available evidence surrounding  
6  
7 165 supervised exercise delivered via telehealth in chronic conditions. This will provide an  
8  
9 166 understanding of current evidence to inform clinical trials in stroke. Our specific research  
10  
11 167 questions are:

12  
13  
14 168 With regards to interventions involving supervised exercise delivered via telehealth in chronic  
15  
16 169 conditions:

- 17  
18  
19 170 1. What population groups have been included in the research and what are the key  
20  
21 171 characteristics of the interventions delivered (including: frequency, duration and  
22  
23 172 intensity; types of exercise included; and telehealth modalities used)?
- 24  
25  
26 173 2. What are health professionals', participants' and carers' experiences of, or attitudes  
27  
28 174 towards, supervised exercise delivered via telehealth?
- 29  
30  
31 175 3. What strategies have been used to optimise safety, feasibility, delivery and adherence?
- 32  
33 176 4. What are the barriers and limitations to these interventions and what strategies have  
34  
35 177 been used to mitigate these?
- 36  
37  
38 178 5. What is the effectiveness and cost-effectiveness of telehealth-supervised exercise sessions  
39  
40 179 for reducing secondary stroke risk factors?

## 41 42 43 44 181 **Methods and analysis:**

45  
46  
47 182 Scoping reviews enable the mapping of research findings and identification of gaps in research  
48  
49 183 evidence while providing a source of knowledge translation<sup>36-38</sup>. We have chosen the scoping  
50  
51 184 review method to evaluate the evidence surrounding supervised exercise delivered via  
52  
53 185 telehealth in chronic conditions because scoping reviews are suited to areas of research where  
54  
55 186 outcomes are not well established<sup>37</sup> or are heterogeneous in nature<sup>38</sup>. We will use the  
56  
57 187 framework of scoping reviews first described by Arksey and O'Malley (2005)<sup>36</sup> which requires  
58  
59  
60

1  
2  
3 188 *identifying the research question; identifying relevant studies; study selection; charting of the*  
4  
5 189 *data; and collating, summarizing and reporting the results.* The refinements to the Arksey and  
6  
7  
8 190 O'Malley (2005)<sup>36</sup> framework suggested by Levac, et al. (2010)<sup>37</sup> and Peters, et al. (2015)<sup>39</sup>  
9  
10 191 will also be considered to optimise transparency and methodological rigour.  
11  
12 192 To optimise reporting this scoping review protocol uses the Preferred Reporting Items for  
13  
14 193 Systematic Review and Meta-analysis Protocols (PRISMA-P)<sup>40 41</sup> method (Appendix 1). Where  
15  
16 194 items in the PRISMA-P are not relevant to scoping reviews, we have adapted the items with  
17  
18 195 reference to the Preferred Reporting Items for Systematic Review and Meta-analysis extension  
19  
20 196 for Scoping Reviews (PRISMA-ScR)<sup>38</sup>. Our scoping review was initiated on September 1<sup>st</sup>  
21  
22 197 2018 and is to be completed by May 30<sup>th</sup> 2019.  
23  
24  
25  
26 198

### 199 ***Identifying the research question***

200 The five research questions of our review are identified in the introduction of this paper. These  
201 questions will inform future research into supervised exercise in stroke survivors by mapping  
202 and identifying gaps in the available evidence regarding supervised exercise delivered via  
203 telehealth in chronic conditions.

204  
205 We define the key terms of the scoping review's questions as follows:

- 206 - *Supervision*: real-time monitoring (visual, or through other continuous physiologic  
207 monitoring such as echocardiogram or heart rate) by a health professional with the  
208 opportunity for participants to receive and provide health professionals feedback in real  
209 time to ensure the exercise is being carried out safely and correctly.
- 210 - *Exercise*: our review will consider exercise as physical activity targeted at reducing  
211 outcomes that impact cardiovascular disease (and secondary stroke) risk factors,  
212 including hypertension, hyperlipidemia, dysglycemia or daily physical activity. To



213 ensure our review captures all evidence relating to the research question regarding the  
 214 safety of supervised exercise delivered via telehealth and its implications for falls risk,  
 215 the definition of exercise will also include any intervention involving lower limb weight  
 216 bearing, for example balance training.

217 - *Telehealth*: The application of telecommunications and virtual technology to provide  
 218 health care outside of conventional health-care facilities (WHO, 2018)<sup>18</sup>.

### 220 **Identifying relevant studies**

221 Studies will be included in the review if they meet the eligibility requirements set out in Box 1.

222 All published primary research studies will be included in the review. The exclusion criteria  
 223 includes otherwise healthy participants with a BMI < 30 to ensure a consistent definition of the  
 224 chronic condition *obesity* as a BMI of 30 or greater<sup>42</sup>. In order to accurately capture current  
 225 approaches to real-time supervised exercise delivered via telehealth in this rapidly evolving  
 226 field, we will also include published trial protocols and abstracts of unpublished studies for  
 227 which authors can be contacted to provide sufficient information. Studies included in the  
 228 scoping review will not be limited by year of publication.

229 Box 1

|                     | <b>Inclusion</b>                                                                                                                                                                                                                                                                                                    | <b>Exclusion</b>                                                                                                                                                                                                                                                                                       |
|---------------------|---------------------------------------------------------------------------------------------------------------------------------------------------------------------------------------------------------------------------------------------------------------------------------------------------------------------|--------------------------------------------------------------------------------------------------------------------------------------------------------------------------------------------------------------------------------------------------------------------------------------------------------|
| <b>Population</b>   | Chronic health condition<br>Adult, 18 years and older                                                                                                                                                                                                                                                               | Healthy participants (including those with a BMI less than 30)                                                                                                                                                                                                                                         |
| <b>Intervention</b> | Supervised exercise delivered via telehealth where:<br><br>- The majority of supervised exercise is delivered via telehealth and this supervision involves observation in real-time (visual, or via other continuous physiologic monitoring)<br><br>- The exercise sessions provide opportunity for participant and | Exercise delivered to participants located onsite at a health-care facility<br><br>Exercise occurring with a health professional present at the participant's site (e.g. expert remotely supervising novice health professional on telehealth)<br><br>Exercise not supervised by a health professional |

|                  |                                                                                                                                                                                                                                                                                                |                                                                                                                                                    |
|------------------|------------------------------------------------------------------------------------------------------------------------------------------------------------------------------------------------------------------------------------------------------------------------------------------------|----------------------------------------------------------------------------------------------------------------------------------------------------|
|                  | health professional feedback to ensure exercises are carried out correctly and safely<br><br>- Exercise that impacts or is intended to impact cardiovascular disease risk or involves lower limb weight bearing                                                                                |                                                                                                                                                    |
| Comparison       | Any                                                                                                                                                                                                                                                                                            | Nil exclusion criteria                                                                                                                             |
| Outcome          | All                                                                                                                                                                                                                                                                                            | Nil exclusion criteria                                                                                                                             |
| Publication Type | Published primary research studies, including both qualitative and quantitative research<br><br>Primary research protocols which have been published<br><br>Abstracts of unpublished studies for which authors can be contacted and provide sufficient information to enable accurate analysis | Text<br><br>Opinion papers<br><br>Letters<br><br>Literature reviews<br><br>Systematic reviews<br><br>Meta-analyses<br><br>Not published in English |

230

### 231 ***Study Selection***

232 We will conduct a comprehensive, systematic search of Medline, CINAHL, Scopus, Cochrane,  
233 Pedro and Embase databases. The search strategy will be developed in consultation with a  
234 senior research librarian and will include use of the relevant index terms and key words for  
235 'exercise' and 'telehealth'. We will hand search the reference lists of all included studies as  
236 well as relevant systematic reviews. Experts in the field will be contacted to identify any other  
237 pertinent research. We will contact authors of abstracts of unpublished studies retrieved and  
238 request they provide information to enable accurate analysis of their research.

239

240 Full details of the databases' draft search strategies are shown in Appendix 2.

241

242 Studies identified through the search strategy will be exported from each database to EndNote  
243 X8.2 and then exported to Covidence for removal of duplicates and screening of titles and

1  
2  
3 244 abstracts. Covidence will be used to manage data throughout the remainder of the review. All  
4  
5 245 titles and abstracts will be independently reviewed by two authors and conflicts will be  
6  
7  
8 246 resolved by a third author. To optimise the reliability of screening of titles and abstracts all  
9  
10 247 authors will participate in the screening of the initial 150 studies for inclusion using the  
11  
12 248 selection criteria (outlined in Box 1). The authors will then then meet to resolve any issues or  
13  
14 249 ambiguities found in the criteria. Following title and abstract screening, full texts of potentially  
15  
16 250 relevant studies will be assessed for eligibility by two authors independently, with any  
17  
18 251 discrepancies resolved by a third author. To support the inherently iterative nature of scoping  
19  
20 252 reviews<sup>36-39</sup>, authors will communicate regularly to discuss the selection process. Any  
21  
22 253 refinements made to the selection criteria will be recorded. The selection process will be  
23  
24 254 reported using a PRISMA 2009 Flow diagram<sup>43</sup>.  
25  
26  
27  
28  
29  
30

### 31 ***Data charting***

32  
33 257 Data charting is the method used for extracting data in scoping reviews<sup>36 38</sup>. It allows  
34  
35 258 researchers to capture a breadth of information including detail on processes to provide further  
36  
37 259 context to the research outcomes<sup>36</sup>. We will develop a standardised electronic form to chart the  
38  
39 260 data. All authors will pilot the data charting form with the initial five studies to ensure the data  
40  
41 261 extracted optimally addresses the research questions<sup>37</sup> and then meet to discuss and resolve any  
42  
43 262 issues identified. This process will also facilitate the reliability of the data charting. The  
44  
45 263 remainder of the data will be charted by one author and checked by a second author. Any  
46  
47 264 discrepancies will be resolved by a third author. The iterative nature of scoping reviews means  
48  
49 265 the data charting form may require adaptation during the data charting process<sup>36-39</sup>. Regular  
50  
51 266 communication between authors will occur to identify, in a timely manner, any need for  
52  
53 267 modification to the data charting form. All significant alterations to the data chart will be  
54  
55 268 recorded.  
56  
57  
58  
59  
60

1  
2  
3 269  
4  
5  
6 270 To avoid inclusion of duplicate data we will identify and group multiple publications relating to  
7  
8 271 the one research project prior to the charting of the data. The study details and outcomes chosen  
9  
10 272 for charting are guided by The Cochrane Collaboration's *Checklist of items to consider in data*  
11  
12 273 *collection or data extraction*<sup>44</sup> and the recommendation of Arksey and O'Malley (2005)<sup>36</sup>.  
13  
14 274 Where available these will include, but are not limited to: bibliographic information; study  
15  
16 275 aims/purpose; research design; number of participants; duration of intervention and follow-up;  
17  
18 276 date; setting; country; co-morbidity; socio-demographics; and specific category of chronic  
19  
20 277 condition. Where available the intervention data extracted will include frequency, intensity,  
21  
22 278 time and type of exercise intervention and any control or comparison groups; the number of  
23  
24 279 intervention groups; the type of telehealth modality used; adherence; satisfaction; and other  
25  
26 280 methods of exercise delivery or support used in the study. All reported outcome measurements  
27  
28 281 will be charted. Details of outcomes which directly inform the research questions including  
29  
30 282 economic viability, intervention feasibility, intervention safety (including adverse events),  
31  
32 283 cardiovascular risk factor indicators (including blood pressure, level of physical activity,  
33  
34 284 cholesterol, lipid profiles, insulin resistance) will be prioritised. Any other key findings or  
35  
36 285 recommendations not captured through the above process which specifically relate to our  
37  
38 286 research questions will also be charted.  
39  
40  
41  
42  
43  
44  
45  
46

47 288 All papers included in the scoping review will be critically appraised. We have chosen to undertake  
48  
49 289 critical appraisal for two reasons. The first, to facilitate accurate identification of evidence gaps  
50  
51 290 which Brien, et al. (2010) highlights can be difficult without the assessment of evidence quality<sup>45</sup>.  
52  
53 291 The second, is to optimise recommendations made for practice to ensure they are based on sound  
54  
55 292 evidence<sup>39</sup>. We will use *The Cochrane Collaboration's tool for assessing risk of bias*<sup>44</sup> to assess  
56  
57 293 the bias of each individual, quantitative study. We will use the *Consolidated Criteria for*  
58  
59  
60

1  
2  
3 294 *Reporting Qualitative Research* (COREQ) checklist<sup>46</sup> and the *Mixed Methods Appraisal Tool*  
4  
5 295 (*MMAT*) – *Version 2011*<sup>47 48</sup> to individually assess qualitative and mixed methods studies for  
6  
7  
8 296 methodological rigour respectively. This critical appraisal will be carried out by two  
9  
10 297 independent authors who will meet to discuss and resolve any discrepancies found in their  
11  
12 298 assessments, with adjudication by a third author if necessary.  
13  
14

299

### 300 ***Collating summarising and reporting of results***

301 Our scoping review will be reported using the PRISMA-ScR<sup>38</sup>. The results will be summarised  
302 and reported to prioritise the findings relevant to the specific research questions. Quantitative  
303 data and the results of individual studies' critical appraisal will be presented in tabular format.  
304 Qualitative data will be analysed thematically and collated concisely into a tabular format. If  
305 needed, further narrative description will be provided to aid interpretation of the results. Visual  
306 or diagrammatic representation of data will occur to aid its summary or conceptualization as  
307 needed.  
308

309

309 To aid the synthesis of the results we will provide a narrative summary of the findings most  
310 pertinent to the review's research questions. Knowledge gaps in the research evidence and  
311 their implications will also be recognized through a narrative summary. Our key findings,  
312 informed by the critical appraisal of individual studies will be used to make recommendations  
313 for future research and practice relating to supervised exercise delivered via telehealth.  
314

315

315 The breadth of research evidence included in this review enables the comprehensive mapping of  
316 interventions involving supervised exercise delivered via telehealth aimed at reducing  
317 cardiovascular disease risk factors. As such, caution should be taken when interpreting the findings  
318 for individual patient populations. Another potential limitation of the study is the oversight of  
319 relevant papers due to the exclusion of grey literature. This has been done to ensure research quality

1  
2  
3 320 can be assessed to optimise recommendations for practice. These and any further limitations  
4  
5 321 identified during the scoping review process will be acknowledged.  
6

7  
8 322

9  
10 323 ***Patient and Public Involvement***

11  
12 324 There will be no patient or public involvement in our scoping review.  
13

14 325

15  
16 326 **Ethics and dissemination:**

17  
18  
19 327 The findings of our scoping review will be disseminated through presentation at appropriate  
20  
21 328 forums or conferences. The completed scoping review will also be submitted for publication in  
22  
23 329 a peer reviewed journal and form part of a PhD thesis. Findings will be directly translated to  
24  
25 330 inform the development of a supervised exercise program delivered via telehealth that will be  
26  
27 331 pilot tested and evaluated in terms of effect on reducing secondary stroke risk factors. We will  
28  
29 332 use only secondary de-identified data in the scoping review, therefore ethics approval is not  
30  
31 333 required.  
32

33  
34 334

35  
36  
37 335 **Discussion**

38  
39 336 The high mortality rates and the significant burden of disease resulting from secondary stroke  
40  
41 337 must be addressed. Our review will explore emerging research in relation to the efficacy,  
42  
43 338 acceptability, safety, economics and feasibility of supervised exercise delivered via telehealth.  
44  
45 339 This research has the potential to provide strategies to overcome current barriers in the  
46  
47 340 translation of evidence for physical activity in stroke survivors to reduce stroke recurrence.  
48  
49 341

50  
51 342

52  
53 343 This review will significantly contribute to the knowledge base of exercise and rehabilitation  
54  
55 344 delivered via telehealth. The breadth of research captured means it has implications beyond  
56  
57 345 stroke care to broadly inform the application of supervised exercise and rehabilitation via  
58  
59 346

1  
2  
3 345 telehealth. It is anticipated that our findings will be relevant to researchers, healthcare workers  
4  
5 346 and policy makers at a national and international level.  
6  
7  
8 347  
9  
10 348

11  
12 349 **Author Statement:**  
13

14 350 All authors made significant intellectual contributions to the protocol. CE conceived the idea  
15  
16 351 for the scoping review. ERR (guarantor) and CE conceptualised and drafted the research  
17  
18 352 questions and study selection criteria, while CMS, EAL, NAF and AP contributed to their  
19  
20 353 further development. ERR developed the study methodology with EAL, CMS, NAF, AP and  
21  
22 354 CE providing feedback for refinement. All authors contributed to the drafting and editing, and  
23  
24  
25  
26 355 approved the final manuscript.  
27  
28  
29  
30  
31  
32  
33  
34  
35  
36  
37  
38  
39  
40  
41  
42  
43  
44  
45  
46  
47  
48  
49  
50  
51  
52  
53  
54  
55  
56  
57  
58  
59  
60

## References

1. World Health Organization. Health statistics and information systems: Disease burden and mortality estimates, cause-specific mortality 2000-2016 [Internet]. World Health Organization; 2018 [cited 2018 September 19]. 2018:[Available from: [http://www.who.int/healthinfo/global\\_burden\\_disease/estimates/en/](http://www.who.int/healthinfo/global_burden_disease/estimates/en/) accessed September 19 2018.
2. World Health Organisation. Health statistics and information systems: Disease burden and mortality estimates, Disease burden 2000-2016 [Internet]. World Health Organization; 2018 [updated 14/10/2018; cited 2018 September 19]. June 2018:[Available from: [http://www.who.int/healthinfo/global\\_burden\\_disease/estimates/en/index1.html](http://www.who.int/healthinfo/global_burden_disease/estimates/en/index1.html) accessed Septemeber 19 2018.
3. Feigin VL, Forouzanfar MH, Krishnamurthi R, et al. Global and regional burden of stroke during 1990–2010: findings from the Global Burden of Disease Study 2010. *Lancet* 2014;383(9913):245-54.
4. Hankey GJ. Secondary stroke prevention. *The Lancet Neurology* 2014;13(2):178-94. doi: [https://dx.doi.org/10.1016/S1474-4422\(13\)70255-2](https://dx.doi.org/10.1016/S1474-4422(13)70255-2)
5. Jorgensen HS, Nakayama H, Reith J, et al. Stroke recurrence: predictors, severity, and prognosis. The Copenhagen Stroke Study. *Neurology* 1997;48(4):891-5.
6. Deijle IA, Van Schaik SM, Van Wegen EEH, et al. Lifestyle Interventions to Prevent Cardiovascular Events After Stroke and Transient Ischemic Attack: Systematic Review and Meta-Analysis. *Stroke* 2017;48(1):174-79. doi: <https://dx.doi.org/10.1161/STROKEAHA.116.013794>
7. D'Isabella NT, Shkredova DA, Richardson JA, et al. Effects of exercise on cardiovascular risk factors following stroke or transient ischemic attack: a systematic review and meta-analysis. *Clin Rehabil* 2017;31(12):1561-72. doi: <https://dx.doi.org/10.1177/0269215517709051>
8. English C, Healy GN, Coates A, et al. Sitting and Activity Time in People With Stroke. *Phys Ther* 2016;96(2):193-201. doi: <https://dx.doi.org/10.2522/ptj.20140522>
9. Boysen G, Krarup L-H, Zeng X, et al. ExStroke Pilot Trial of the effect of repeated instructions to improve physical activity after ischaemic stroke: a multinational randomised controlled clinical trial. *BMJ (Clinical research ed)* 2009;339:b2810. doi: <https://dx.doi.org/10.1136/bmj.b2810>
10. Fini NA, Holland AE, Keating J, et al. How Physically Active Are People Following Stroke? Systematic Review and Quantitative Synthesis. *Phys Ther* 2017;97(7):707-17. doi: 10.1093/ptj/pzx038 [published Online First: 2017/04/27]
11. Olney SJ, Nymark J, Brouwer B, et al. A randomized controlled trial of supervised versus unsupervised exercise programs for ambulatory stroke survivors. *Stroke* 2006;37(2):476-81.
12. Simpson LA, Eng JJ, Tawashy AE. Exercise perceptions among people with stroke: Barriers and facilitators to participation. *Int J Ther Rehabil* 2011;18(9):520-30. [published Online First: 2011/09/06]
13. English C, Hillier SL, Lynch EA. Circuit class therapy for improving mobility after stroke. *The Cochrane database of systematic reviews* 2017;6:CD007513. doi: <https://dx.doi.org/10.1002/14651858.CD007513.pub3>
14. Duncan P, Studenski S, Richards L, et al. Randomized clinical trial of therapeutic exercise in subacute stroke. *Stroke* 2003;34(9):2173-80.
15. Thilarajah S, Mentiplay BF, Bower KJ, et al. Factors Associated With Post-Stroke Physical Activity: A Systematic Review and Meta-Analysis. *Arch Phys Med Rehabil* 2018;99(9):1876-89. doi: 10.1016/j.apmr.2017.09.117 [published Online First: 2017/10/24]



- 1  
2  
3 407 16. Nicholson SL, Donaghy M, Johnston M, et al. A qualitative theory guided analysis of  
4 408 stroke survivors' perceived barriers and facilitators to physical activity. *Disabil Rehabil*  
5 409 2014;36(22):1857-68. doi: <https://dx.doi.org/10.3109/09638288.2013.874506>  
6  
7 410 17. Marzolini S, Balitsky A, Jagroop D, et al. Factors Affecting Attendance at an Adapted  
8 411 Cardiac Rehabilitation Exercise Program for Individuals with Mobility Deficits  
9 412 Poststroke. *Journal of stroke and cerebrovascular diseases : the official journal of*  
10 413 *National Stroke Association* 2016;25(1):87-94. doi:  
11 414 <https://dx.doi.org/10.1016/j.jstrokecerebrovasdis.2015.08.039>  
12  
13 415 18. World Health Organisation. Health and sustainable development: Telehealth [Internet].  
14 416 World Health Organization; ND [cited 2018 September 19]. Available from:  
15 417 <http://www.who.int/sustainable-development/health-sector/strategies/telehealth/en/>  
16 418 accessed September 19 2018.  
17 419 19. van Egmond MA, van der Schaaf M, Vredevelde T, et al. Effectiveness of physiotherapy  
18 420 with telerehabilitation in surgical patients: a systematic review and meta-analysis.  
19 421 *Physiotherapy* 2018;104(3):277-98. doi:  
20 422 <https://dx.doi.org/10.1016/j.physio.2018.04.004>  
21  
22 423 20. Tsai LLY, McNamara RJ, Moddel C, et al. Home-based telerehabilitation via real-time  
23 424 videoconferencing improves endurance exercise capacity in patients with COPD: The  
24 425 randomized controlled TeleR Study. *Respirology (Carlton, Vic)* 2017;22(4):699-707.  
25 426 doi: <https://dx.doi.org/10.1111/resp.12966>  
26 427 21. Paneroni M, Colombo F, Papalia A, et al. Is Telerehabilitation a Safe and Viable Option for  
27 428 Patients with COPD? A Feasibility Study. *Copd* 2015;12(2):217-25. doi:  
28 429 <https://dx.doi.org/10.3109/15412555.2014.933794>  
29  
30 430 22. Hwang R, Bruning J, Morris N, et al. A Systematic Review of the Effects of  
31 431 Telerehabilitation in Patients With Cardiopulmonary Diseases. *J Cardiopulm Rehabil*  
32 432 *Prev* 2015;35(6):380-9. doi: <https://dx.doi.org/10.1097/HCR.000000000000121>  
33 433 23. Clark RA, Conway A, Poulsen V, et al. Alternative models of cardiac rehabilitation: a  
34 434 systematic review. *Eur J Prev Cardiol* 2015;22(1):35-74. doi:  
35 435 <https://dx.doi.org/10.1177/2047487313501093>  
36 436 24. Maddison R, Rawstorn JC, Stewart RAH, et al. Effects and costs of real-time cardiac  
37 437 telerehabilitation: randomised controlled non-inferiority trial. *Heart (British Cardiac*  
38 438 *Society)* 2018 doi: <https://dx.doi.org/10.1136/heartjnl-2018-313189>  
39  
40 439 25. Douiri A, Rudd AG, Wolfe CD. Prevalence of poststroke cognitive impairment: South  
41 440 London Stroke Register 1995-2010. *Stroke* 2013;44(1):138-45. doi:  
42 441 10.1161/strokeaha.112.670844 [published Online First: 2012/11/15]  
43 442 26. Blennerhassett JM, Levy CE, Mackintosh A, et al. One-Quarter of People Leave Inpatient  
44 443 Stroke Rehabilitation with Physical Capacity for Community Ambulation. *Journal of*  
45 444 *stroke and cerebrovascular diseases : the official journal of National Stroke*  
46 445 *Association* 2018 doi: <https://dx.doi.org/10.1016/j.jstrokecerebrovasdis.2018.08.004>  
47  
48 446 27. Deloitte Access Economics. The economic impact of stroke in Australia. 2013 [published  
49 447 Online First: 13.03.2013]  
50 448 28. Nadarajah M, Goh HT. Post-stroke fatigue: a review on prevalence, correlates,  
51 449 measurement, and management. *Top Stroke Rehabil* 2015;22(3):208-20. doi:  
52 450 10.1179/1074935714z.0000000015 [published Online First: 2015/03/18]  
53 451 29. Billinger SA, Arena R, Bernhardt J, et al. Physical activity and exercise recommendations  
54 452 for stroke survivors: a statement for healthcare professionals from the American Heart  
55 453 Association/American Stroke Association. *Stroke* 2014;45(8):2532-53. doi:  
56 454 10.1161/str.000000000000022 [published Online First: 2014/05/23]  
57 455 30. Wein T, Lindsay MP, Cote R, et al. Canadian stroke best practice recommendations:  
58 456 Secondary prevention of stroke, sixth edition practice guidelines, update 2017.

- 1  
2  
3 457 *International journal of stroke : official journal of the International Stroke Society*  
4 458 2018;13(4):420-43. doi: <https://dx.doi.org/10.1177/1747493017743062>
- 5 459 31. Jorgensen L, Engstad T, Jacobsen BK. Higher incidence of falls in long-term stroke  
6 460 survivors than in population controls: depressive symptoms predict falls after stroke.  
7 461 *Stroke* 2002;33(2):542-7. [published Online First: 2002/02/02]
- 8 462 32. Tilson JK, Wu SS, Cen SY, et al. Characterizing and identifying risk for falls in the LEAPS  
9 463 study: a randomized clinical trial of interventions to improve walking poststroke. *Stroke*  
10 464 2012;43(2):446-52. doi: 10.1161/strokeaha.111.636258 [published Online First:  
11 465 2012/01/17]
- 12 466 33. Weerdesteyn V, de Niet M, van Duijnhoven HJ, et al. Falls in individuals with stroke. *J*  
13 467 *Rehabil Res Dev* 2008;45(8):1195-213. [published Online First: 2009/02/24]
- 14 468 34. Wada N, Sohmiya M, Shimizu T, et al. Clinical analysis of risk factors for falls in home-  
15 469 living stroke patients using functional evaluation tools. *Arch Phys Med Rehabil*  
16 470 2007;88(12):1601-5. doi: 10.1016/j.apmr.2007.09.005 [published Online First:  
17 471 2007/12/01]
- 18 472 35. Sarfo FS, Ulasavets U, Opare-Sem OK, et al. Tele-Rehabilitation after Stroke: An Updated  
19 473 Systematic Review of the Literature. *Journal of stroke and cerebrovascular diseases : the official journal of National Stroke Association* 2018;27(9):2306-18. doi:  
20 474 <https://dx.doi.org/10.1016/j.jstrokecerebrovasdis.2018.05.013>
- 21 475 36. Arksey H, O'Malley L. Scoping studies: Towards a methodological framework. *Int J Soc*  
22 476 *Res Methodol: Theory Pract* 2005;8(1):19-32. doi: 10.1080/1364557032000119616
- 23 477 37. Levac D, Colquhoun H, O'Brien KK. Scoping studies: advancing the methodology.  
24 478 *Implementation science : IS* 2010;5:69. doi: <https://dx.doi.org/10.1186/1748-5908-5-69>
- 25 479 38. Tricco AC, Lillie E, Zarin W, et al. PRISMA Extension for Scoping Reviews (PRISMA-  
26 480 ScR): Checklist and Explanation. *Ann Intern Med* 2018 doi:  
27 481 <https://dx.doi.org/10.7326/M18-0850>
- 28 482 39. Peters MDJ, Godfrey CM, Khalil H, et al. Guidance for conducting systematic scoping  
29 483 reviews. *International journal of evidence-based healthcare* 2015;13(3):141-6. doi:  
30 484 <https://dx.doi.org/10.1097/XEB.0000000000000050>
- 31 485 40. Moher D, Shamseer L, Clarke M, et al. Preferred reporting items for systematic review and  
32 486 meta-analysis protocols (PRISMA-P) 2015 statement. *Syst Rev* 2015;4:1. doi:  
33 487 10.1186/2046-4053-4-1 [published Online First: 2015/01/03]
- 34 488 41. Shamseer L, Moher D, Clarke M, et al. Preferred reporting items for systematic review and  
35 489 meta-analysis protocols (PRISMA-P) 2015: elaboration and explanation. *Bmj*  
36 490 2015;350:g7647. doi: 10.1136/bmj.g7647 [published Online First: 2015/01/04]
- 37 491 42. World Health Organization. Obesity and overweight [Fact Sheet of the World Health  
38 492 Organization]. 2018 [cited 2018 1.12.2018]. Available from:  
39 493 <http://www.who.int/en/news-room/fact-sheets/detail/obesity-and-overweight> accessed  
40 494 1.12.2018.
- 41 495 43. Moher D, Liberati A, Tetzlaff J, et al. Preferred reporting items for systematic reviews and  
42 496 meta-analyses: the PRISMA statement. *Bmj* 2009;339:b2535. doi: 10.1136/bmj.b2535  
43 497 [published Online First: 2009/07/23]
- 44 498 44. Higgins J, (Eds) GS. Cochrane Handbook for Systematic Reviews of Interventions Version  
45 499 5.1.0 *The Cochrane Collaboration* 2011
- 46 500 45. Brien SE, Lorenzetti DL, Lewis S, et al. Overview of a formal scoping review on health  
47 501 system report cards. *Implement Sci* 2010;5:2. doi: 10.1186/1748-5908-5-2 [published  
48 502 Online First: 2010/03/09]
- 49 503 46. Tong A, Sainsbury P, Craig J. Consolidated criteria for reporting qualitative research  
50 504 (COREQ): a 32-item checklist for interviews and focus groups. *International journal*  
51 505 *for quality in health care : journal of the International Society for Quality in Health*  
52 506

- 1  
2  
3 507 *Care* 2007;19(6):349-57. doi: 10.1093/intqhc/mzm042 [published Online First:  
4 508 2007/09/18]
- 5  
6 509 47. Pluye P, Robert E, Cargo M, et al. Proposal: A mixed methods appraisal tool for systematic  
7 510 mixed studies reviews <http://mixedmethodsappraisaltoolpublic.pbworks.com/>.  
8 511 Archived by WebCite ® at <http://www.webcitation.org/5tTRTc9yJ2011> [cited 2018  
9 512 October 22]. accessed October 22 2018.
- 10 513 48. Pluye P, Gagnon MP, Griffiths F, et al. A scoring system for appraising mixed methods  
11 514 research, and concomitantly appraising qualitative, quantitative and mixed methods  
12 515 primary studies in Mixed Studies Reviews. *Int J Nurs Stud* 2009;46(4):529-46. doi:  
13 516 10.1016/j.ijnurstu.2009.01.009 [published Online First: 2009/02/24]  
14  
15 517

16  
17  
18  
19  
20  
21  
22  
23  
24  
25  
26  
27  
28  
29  
30  
31  
32  
33  
34  
35  
36  
37  
38  
39  
40  
41  
42  
43  
44  
45  
46  
47  
48  
49  
50  
51  
52  
53  
54  
55  
56  
57  
58  
59  
60

For peer review only

## PRISMA-P (Preferred Reporting Items for Systematic review and Meta-Analysis Protocols) 2015 checklist: recommended items to address in a systematic review protocol\*

| Section and topic                 | Item No | Checklist item                                                                                                                                                                                                                | Location in Document                                                                          |
|-----------------------------------|---------|-------------------------------------------------------------------------------------------------------------------------------------------------------------------------------------------------------------------------------|-----------------------------------------------------------------------------------------------|
| <b>ADMINISTRATIVE INFORMATION</b> |         |                                                                                                                                                                                                                               |                                                                                               |
| Title:                            |         |                                                                                                                                                                                                                               |                                                                                               |
| Identification                    | 1a      | Identify the report as a protocol of a systematic review                                                                                                                                                                      | Page 1, Line 2                                                                                |
| Update                            | 1b      | If the protocol is for an update of a previous systematic review, identify as such                                                                                                                                            | Not applicable                                                                                |
| Registration                      | 2       | If registered, provide the name of the registry (such as PROSPERO) and registration number                                                                                                                                    | Not applicable (PROSPERO does not register scoping reviews) this is stated on Page 6, Line 96 |
| Authors:                          |         |                                                                                                                                                                                                                               |                                                                                               |
| Contact                           | 3a      | Provide name, institutional affiliation, e-mail address of all protocol authors; provide physical mailing address of corresponding author                                                                                     | Page 1-2, Lines 5-34 ; Page 2, Line 38-9                                                      |
| Contributions                     | 3b      | Describe contributions of protocol authors and identify the guarantor of the review                                                                                                                                           | Page 18, Lines 350-355                                                                        |
| Amendments                        | 4       | If the protocol represents an amendment of a previously completed or published protocol, identify as such and list changes; otherwise, state plan for documenting important protocol amendments                               | Not applicable                                                                                |
| Support:                          |         |                                                                                                                                                                                                                               |                                                                                               |
| Sources                           | 5a      | Indicate sources of financial or other support for the review                                                                                                                                                                 | Page 3, Lines 56-60                                                                           |
| Sponsor                           | 5b      | Provide name for the review funder and/or sponsor                                                                                                                                                                             | Not applicable                                                                                |
| Role of sponsor or funder         | 5c      | Describe roles of funder(s), sponsor(s), and/or institution(s), if any, in developing the protocol                                                                                                                            | Not applicable                                                                                |
| <b>INTRODUCTION</b>               |         |                                                                                                                                                                                                                               |                                                                                               |
| Rationale                         | 6       | Describe the rationale for the review in the context of what is already known                                                                                                                                                 | Pages 8-9, Lines 115-161                                                                      |
| Objectives                        | 7       | Provide an explicit statement of the question(s) the review will address with reference to participants, interventions, comparators, and outcomes (PICO)                                                                      | Page 10, Lines 168-179                                                                        |
| <b>METHODS</b>                    |         |                                                                                                                                                                                                                               |                                                                                               |
| Eligibility criteria              | 8       | Specify the study characteristics (such as PICO, study design, setting, time frame) and report characteristics (such as years considered, language, publication status) to be used as criteria for eligibility for the review | Pages 12-13, Lines 220-230 (including Box 1)                                                  |
| Information sources               | 9       | Describe all intended information sources (such as electronic databases, contact with study authors, trial registers or other grey literature sources) with planned dates of coverage                                         | Page 12, Lines 227-228 and Page 13, Lines 232-238                                             |
| Search strategy                   | 10      | Present draft of search strategy to be used for at least one electronic database, including planned limits, such that it could be repeated                                                                                    | Details in Appendix 2, referred to on Page 13, Line 240                                       |
| Study records:                    |         |                                                                                                                                                                                                                               |                                                                                               |

|    |                                    |     |                                                                                                                                                                                                                                                  |                                                                                                                                                                     |
|----|------------------------------------|-----|--------------------------------------------------------------------------------------------------------------------------------------------------------------------------------------------------------------------------------------------------|---------------------------------------------------------------------------------------------------------------------------------------------------------------------|
| 1  | Data management                    | 11a | Describe the mechanism(s) that will be used to manage records and data throughout the review                                                                                                                                                     | Pages 13-14, Lines 242-244                                                                                                                                          |
| 2  | Selection process                  | 11b | State the process that will be used for selecting studies (such as two independent reviewers) through each phase of the review (that is, screening, eligibility and inclusion in meta-analysis)                                                  | Page 14, Lines 244-251                                                                                                                                              |
| 3  |                                    |     |                                                                                                                                                                                                                                                  |                                                                                                                                                                     |
| 4  | Data collection process            | 11c | Describe planned method of extracting data from reports (such as piloting forms, done independently, in duplicate), any processes for obtaining and confirming data from investigators                                                           | Page 14, Lines 256-268                                                                                                                                              |
| 5  |                                    |     |                                                                                                                                                                                                                                                  |                                                                                                                                                                     |
| 6  | Data items                         | 12  | List and define all variables for which data will be sought (such as PICO items, funding sources), any pre-planned data assumptions and simplifications                                                                                          | Page 15, Lines 274-280 (N.B. the protocol provides flexibility to add further data items to facilitate the iterative nature of scoping reviews)                     |
| 7  |                                    |     |                                                                                                                                                                                                                                                  |                                                                                                                                                                     |
| 8  | Outcomes and prioritization        | 13  | List and define all outcomes for which data will be sought, including prioritization of main and additional outcomes, with rationale                                                                                                             | Page 15, Lines 280-286                                                                                                                                              |
| 9  |                                    |     |                                                                                                                                                                                                                                                  |                                                                                                                                                                     |
| 10 | Risk of bias in individual studies | 14  | Describe anticipated methods for assessing risk of bias of individual studies, including whether this will be done at the outcome or study level, or both; state how this information will be used in data synthesis                             | Pages 15-16, Lines 292-298<br>Data synthesis not appropriate (scoping review). This information includes information on critical appraisal that will be undertaken. |
| 11 |                                    |     |                                                                                                                                                                                                                                                  |                                                                                                                                                                     |
| 12 | Data synthesis                     | 15a | Describe criteria under which study data will be quantitatively synthesised                                                                                                                                                                      | Not applicable (scoping review)                                                                                                                                     |
| 13 |                                    | 15b | If data are appropriate for quantitative synthesis, describe planned summary measures, methods of handling data and methods of combining data from studies, including any planned exploration of consistency (such as $I^2$ , Kendall's $\tau$ ) | Not applicable (scoping review)                                                                                                                                     |
| 14 |                                    | 15c | Describe any proposed additional analyses (such as sensitivity or subgroup analyses, meta-regression)                                                                                                                                            | Not applicable (scoping review)                                                                                                                                     |
| 15 |                                    | 15d | If quantitative synthesis is not appropriate, describe the type of summary planned                                                                                                                                                               | Pages 16, Lines 300-313                                                                                                                                             |
| 16 | Meta-bias(es)                      | 16  | Specify any planned assessment of meta-bias(es) (such as publication bias across studies, selective reporting within studies)                                                                                                                    | Not applicable (scoping review)                                                                                                                                     |
| 17 |                                    |     |                                                                                                                                                                                                                                                  |                                                                                                                                                                     |
| 18 | Confidence in cumulative evidence  | 17  | Describe how the strength of the body of evidence will be assessed (such as GRADE)                                                                                                                                                               | Not applicable (scoping review)                                                                                                                                     |
| 19 |                                    |     |                                                                                                                                                                                                                                                  |                                                                                                                                                                     |

**\* It is strongly recommended that this checklist be read in conjunction with the PRISMA-P Explanation and Elaboration (cite when available) for important clarification on the items. Amendments to a review protocol should be tracked and dated. The copyright for PRISMA-P (including checklist) is held by the PRISMA-P Group and is distributed under a Creative Commons Attribution Licence 4.0.**

*From: Shamseer L, Moher D, Clarke M, Ghersi D, Liberati A, Petticrew M, Shekelle P, Stewart L, PRISMA-P Group. Preferred reporting items for systematic review and meta-analysis protocols (PRISMA-P) 2015: elaboration and explanation. BMJ. 2015 Jan 2;349(jan02 1):g7647.*

## Appendix 2: DRAFT search strategy

### Medline

- #1 exp Telemedicine/  
 #2 exp VIDEOCONFERENCING/  
 #3 exp Remote Consultation/  
 #4 (ehealth\* or e-health\* or e health\* or electronic-health\* or electronic health\* or mhealth\* or m-health\* or m health\* or mobile health\* or mobile-health\* or emedic\* or e-medic\* or e medic\* or electronic-medic\* or electronic-medic\*).mp.  
 #5 (videoconferenc\* or video-conferenc\* or video conferenc\* or teleconsult\* or teleconsult\* or tele consult\* or teleconferenc\* or tele-conferenc\* or tele conferenc\* or videoconsult\* or video-consult\* or video consult\*).mp.  
 #6 (interactive adj ((health adj communicat\*) or video\* or technolog\* or multimedia)).mp.  
 #7 ((digital health or digital) adj intervention\*).mp.  
 #8 (telehealth\* or tele-health\* or tele health or telemedic\* or tele-medic\* or telemedic\* or telerehab\* or tele-rehab\* or tele rehab\* or teleconsult\* or teleconsult\* or tele consult\* or telemonitor\* or tele-monitor\* or tele monitor\*).mp.  
 #9 1 or 2 or 3 or 4 or 5 or 6 or 7 or 8  
 #10 exp EXERCISE/  
 #11 exp Exercise Therapy/  
 #12 exp REHABILITATION/  
 #13 (physiotherap\* or physical therap\* or physical activ\* or physical train\* or physical condition\* or exercis\* or rehab\* or exercise therap\* or exercise train\*).mp.  
 #14 10 or 11 or 12 or 13  
 #15 9 and 14

### CINAHL

- S13 S11 AND S12  
 S12 S1 OR S2 OR S3  
 S11 S4 OR S5 OR S6 OR S7 OR S8 OR S9 OR S10  
 S10 ((digital health or digital) adj intervention\*)  
 S9 (interactive adj ((health adj communicat\*) or video\* or technolog\* or multimedia))

- 1  
2  
3  
4 S8 "videoconferenc\*" or "video-conferenc\*" or "video conferenc\*" or "teleconsult\*" or "tele-consult\*" or "tele consult\*" or "teleconferenc\*" or "tele-conferenc\*" or "tele conferenc\*" or "videoconsult\*" or "video-consult\*" or "video consult\*"
- 7  
8 S7 "ehealth\*" or "e-health\*" or "e health\*" or "electronic-health\*" or "electronic health\*" or "mhealth\*" or "m-health\*" or "m health\*" or "mobile health\*" or "mobile-health\*" or "emedic\*" or "e-medic\*" or "e medic\*" or "electronic-medic\*" or "electronic-medic\*"
- 12  
13 S6 "telehealth\*" or "tele-health\*" or "tele health" or "telemedic\*" or "tele-medic\*" or "telemedic\*" or "telerehab\*" or "tele-rehab\*" or "tele rehab\*" or "teleconsult\*" or "tele-consult\*" or "tele consult\*" or "telemonitor\*" or "tele-monitor\*" or "tele monitor\*"
- 17  
18 S5 (MH "Videoconferencing+")
- 19  
20 S4 (MH "Telehealth+")
- 21  
22 S3 "physiotherap\*" or "physical therap\*" or "physical activ\*" or "physical train\*" or "physical condition\*" or "exercis\*" or "rehab\*" or "exercise therap\*" or "exercise train\*"
- 25  
26 S2 (MH "Rehabilitation+")
- 27  
28 S1 (MH "Exercise+")

## Cochrane

- 32 #1 MeSH descriptor: [Telemedicine] explode all trees
- 33 #2 MeSH descriptor: [Videoconferencing] this term only
- 34 #3 "videoconference" or "video-conference" or "video conference" or "teleconsultation" or "tele-consultation" or "tele consultation" or "teleconference" or "tele-conference" or "tele conference" or "videoconsultation" or "video-consultation" or "video consultation"
- 39 #4 "ehealth" or "e-health" or "e health" or "electronic-health" or "electronic health" or "mhealth" or "m-health" or "m health" or "mobile health" or "mobile-health" or "medicine" or "e-medicine" or "e medicine" or "electronic-medicine" or "electronic-medicine"
- 45 #5 "telehealth" or "tele-health" or "tele health" or "telemedicine" or "tele-medicine" or "telemedicine" or "telerehabilitation" or "tele-rehabilitation" or "tele rehabilitation" or "teleconsultation" or "tele-consultation" or "tele consultation" or "telemonitor" or "tele-monitor" or "tele monitor"
- 50 #6 "digital health intervention" or "digital intervention"
- 51 #7 "interactive video" or "interactive technology" or "interactive multimedia" or "interactive health"
- 55 #8 #1 or #2 or #3 or #4 or #5 or #6 or #7
- 56 #9 MeSH descriptor: [Exercise] explode all trees
- 57 #10 MeSH descriptor: [Rehabilitation] explode all trees
- 58  
59  
60

- 1  
2  
3 #11 "physiotherapy" or "physical therapy" or "physical activity" or "physical training" or  
4 "physical conditioning" or "exercise" or "rehabilitation" or "rehab" or "exercise  
5 therapy"  
6  
7 #12 #9 or #10 or #11  
8  
9 #13 #12 and #8  
10

## 11 Embase

- 12  
13  
14 #1 exp exercise/  
15  
16 #2 exp kinesiotherapy/  
17  
18 #3 exp rehabilitation patient/ or exp rehabilitation medicine/ or exp rehabilitation/ or exp  
19 stroke rehabilitation/ or exp athletic rehabilitation/ or exp pulmonary rehabilitation/ or exp  
20 community based rehabilitation/ or exp geriatric rehabilitation/ or exp rehabilitation  
21 center/ or exp heart rehabilitation/ or exp cancer rehabilitation/ or exp rehabilitation care/  
22 or exp rehabilitation nursing/  
23  
24 #4 (physiotherap\* or physical therap\* or physical activ\* or physical train\* or physical  
25 condition\* or exercis\* or rehab\* or exercise therap\* or exercise train\*).mp.  
26  
27 #5 1 or 2 or 3 or 4  
28  
29 #6 exp telehealth/ or telemedicine/ or exp telerehabilitation/ or exp telemonitoring/ or exp  
30 teleconsultation/ or exp videoconferencing/  
31  
32 #7 (ehealth\* or e-health\* or e health\* or electronic-health\* or electronic health\* or mhealth\*  
33 or m-health\* or m health\* or mobile health\* or mobile-health\* or emedic\* or e-medic\* or  
34 e medic\* or electronic-medic\* or electronic-medic\*).mp.  
35  
36 #8 (videoconferenc\* or video-conferenc\* or video conferenc\* or teleconsult\* or tele-consult\*  
37 or tele consult\* or teleconferenc\* or tele-conferenc\* or tele conferenc\* or videoconsult\*  
38 or video-consult\* or video consult\*).mp.  
39  
40 #9 (telehealth\* or tele-health\* or tele health or telemedic\* or tele-medic\* or telemedic\* or  
41 telerehab\* or tele-rehab\* or tele rehab\* or teleconsult\* or tele-consult\* or tele consult\* or  
42 telemonitor\* or tele-monitor\* or tele monitor\*).mp.  
43  
44 #10 ((digital health or digital) adj intervention\*).mp.  
45  
46 #11 (interactive adj ((health adj communicat\*) or video\* or technolog\* or multimedia)).mp.  
47  
48 #12 6 or 7 or 8 or 9 or 10 or 11  
49  
50 #13 5 and 12  
51  
52  
53  
54

## 55 Scopus

56  
57 (( TITLE-ABS-KEY ( "videoconference" OR "video-conference" OR "video  
58 conference" OR "teleconsultation" OR "tele-consultation" OR "tele  
59 consultation" OR "teleconference" OR "tele-conference" OR "tele



1  
2  
3 conference" )) OR ( TITLE-ABS-KEY ( "videoconsultation" OR "video-  
4 consultation" OR "video consultation" OR "ehealth" OR "e-health" OR "e  
5 health" OR "electronic-health" OR "electronic health" OR "mhealth" OR "m-  
6 health" OR "m health" OR "mobile health" OR "mobile-health" )) OR ( TITLE-  
7 ABS-KEY ( "emedicine" OR "e-medicine" OR "e medicine" OR "electronic-  
8 medicine" OR "electronic-medicine" OR "telehealth" OR "tele-health" OR "tele  
9 health" )) OR ( TITLE-ABS-KEY ( "telemedicine" OR "tele-  
10 medicine" OR "telemedicine" OR "telerehabilitation" OR "tele-  
11 rehabilitation" OR "tele rehabilitation" OR "teleconsultation" OR "tele-  
12 consultation" OR "tele consultation" OR "telemonitor" OR "tele-  
13 monitor" OR "tele monitor" )) OR ( TITLE-ABS-KEY ( "digital health  
14 intervention" OR "digital intervention" )) OR ( TITLE-ABS-KEY ( "interactive  
15 video" OR "interactive technology" OR "interactive multimedia" OR "interactive  
16 health" )) AND ( TITLE-ABS-KEY ( "physiotherapy" OR "physical  
17 therapy" OR "physical activity" OR "physical training" OR "physical  
18 conditioning" OR "exercise" OR "rehabilitation" OR "rehab" OR "exercise  
19 therapy" OR "exercise training" ))  
20  
21  
22  
23  
24

25 **Pedro**

26 Telerehab\* exercis\*  
27  
28  
29  
30  
31  
32  
33  
34  
35  
36  
37  
38  
39  
40  
41  
42  
43  
44  
45  
46  
47  
48  
49  
50  
51  
52  
53  
54  
55  
56  
57  
58  
59  
60
