# Supplementary material for: Supervised exercise delivered via telehealth in real time to manage chronic conditions in adults: a protocol for a scoping review to inform future research in stroke survivors
Source: PubMed Central journal article supplement — BMJ Open. 2019 Mar 20;9(3):e027416. doi: 10.1136/bmjopen-2018-027416 (PMC6527978; doi:10.1136/bmjopen-2018-027416), 2019-03-20
Supplement: bmjopen-2018-027416supp002.pdf [file bmjopen-2018-027416supp002.pdf]

## Appendix 2: DRAFT search strategy

### Medline

- #1 exp Telemedicine/
- #2 exp VIDEOCONFERENCING/
- #3 exp Remote Consultation/
- #4 (ehealth\* or e-health\* or e health\* or electronic-health\* or electronic health\* or mhealth\* or m-health\* or m health\* or mobile health\* or mobile-health\* or emedic\* or e-medic\* or e medic\* or electronic-medic\* or electronic-medic\*).mp.
- #5 (videoconferenc\* or video-conferenc\* or video conferenc\* or teleconsult\* or teleconsult\* or tele consult\* or teleconferenc\* or tele-conferenc\* or tele conferenc\* or videoconsult\* or video-consult\* or video consult\*).mp.
- #6 (interactive adj ((health adj communicat\*) or video\* or technolog\* or multimedia)).mp.
- #7 ((digital health or digital) adj intervention\*).mp.
- #8 (telehealth\* or tele-health\* or tele health or telemedic\* or tele-medic\* or telemedic\* or telerehab\* or tele-rehab\* or tele rehab\* or teleconsult\* or teleconsult\* or tele consult\* or telemonitor\* or tele-monitor\* or tele monitor\*).mp.
- #9 1 or 2 or 3 or 4 or 5 or 6 or 7 or 8
- #10 exp EXERCISE/
- #11 exp Exercise Therapy/
- #12 exp REHABILITATION/
- #13 (physiotherap\* or physical therap\* or physical activ\* or physical train\* or physical condition\* or exercis\* or rehab\* or exercise therap\* or exercise train\*).mp.
- #14 10 or 11 or 12 or 13
- #15 9 and 14

### CINAHL

- S13 S11 AND S12
- S12 S1 OR S2 OR S3
- S11 S4 OR S5 OR S6 OR S7 OR S8 OR S9 OR S10
- S10 ((digital health or digital) adj intervention\*)
- S9 (interactive adj ((health adj communicat\*) or video\* or technolog\* or multimedia))

- S8 "videoconferenc\*" or "video-conferenc\*" or "video conferenc\*" or "teleconsult\*" or "tele-consult\*" or "tele consult\*" or "teleconferenc\*" or "tele-conferenc\*" or "tele conferenc\*" or "videoconsult\*" or "video-consult\*" or "video consult\*"
- S7 "ehealth\*" or "e-health\*" or "e health\*" or "electronic-health\*" or "electronic health\*" or "mhealth\*" or "m-health\*" or "m health\*" or "mobile health\*" or "mobile-health\*" or "emedic\*" or "e-medic\*" or "e medic\*" or "electronic-medic\*" or "electronic-medic\*"
- S6 "telehealth\*" or "tele-health\*" or "tele health" or "telemedic\*" or "tele-medic\*" or "telemedic\*" or "telerehab\*" or "tele-rehab\*" or "tele rehab\*" or "teleconsult\*" or "tele-consult\*" or "tele consult\*" or "telemonitor\*" or "tele-monitor\*" or "tele monitor\*"
- S5 (MH "Videoconferencing+")
- S4 (MH "Telehealth+")
- S3 "physiotherap\*" or "physical therap\*" or "physical activ\*" or "physical train\*" or "physical condition\*" or "exercis\*" or "rehab\*" or "exercise therap\*" or "exercise train\*"
- S2 (MH "Rehabilitation+")
- S1 (MH "Exercise+")

## Cochrane

- #1 MeSH descriptor: [Telemedicine] explode all trees
- #2 MeSH descriptor: [Videoconferencing] this term only
- #3 "videoconference" or "video-conference" or "video conference" or "teleconsultation" or "tele-consultation" or "tele consultation" or "teleconference" or "tele-conference" or "tele conference" or "videoconsultation" or "video-consultation" or "video consultation"
- #4 "ehealth" or "e-health" or "e health" or "electronic-health" or "electronic health" or "mhealth" or "m-health" or "m health" or "mobile health" or "mobile-health" or "emedicine" or "e-medicine" or "e medicine" or "electronic-medicine" or "electronic-medicine"
- #5 "telehealth" or "tele-health" or "tele health" or "telemedicine" or "tele-medicine" or "telemedicine" or "telerehabilitation" or "tele-rehabilitation" or "tele rehabilitation" or "teleconsultation" or "tele-consultation" or "tele consultation" or "telemonitor" or "tele-monitor" or "tele monitor"
- #6 "digital health intervention" or "digital intervention"
- #7 "interactive video" or "interactive technology" or "interactive multimedia" or "interactive health"
- #8 #1 or #2 or #3 or #4 or #5 or #6 or #7
- #9 MeSH descriptor: [Exercise] explode all trees
- #10 MeSH descriptor: [Rehabilitation] explode all trees

- #11 "physiotherapy" or "physical therapy" or "physical activity" or "physical training" or "physical conditioning" or "exercise" or "rehabilitation" or "rehab" or "exercise therapy"
- #12 #9 or #10 or #11
- #13 #12 and #8

## Embase

- #1 exp exercise/
- #2 exp kinesiotherapy/
- #3 exp rehabilitation patient/ or exp rehabilitation medicine/ or exp rehabilitation/ or exp stroke rehabilitation/ or exp athletic rehabilitation/ or exp pulmonary rehabilitation/ or exp community based rehabilitation/ or exp geriatric rehabilitation/ or exp rehabilitation center/ or exp heart rehabilitation/ or exp cancer rehabilitation/ or exp rehabilitation care/ or exp rehabilitation nursing/
- #4 (physiotherap\* or physical therap\* or physical activ\* or physical train\* or physical condition\* or exercis\* or rehab\* or exercise therap\* or exercise train\*).mp.
- #5 1 or 2 or 3 or 4
- #6 exp telehealth/ or telemedicine/ or exp telerehabilitation/ or exp telemonitoring/ or exp teleconsultation/ or exp videoconferencing/
- #7 (ehealth\* or e-health\* or e health\* or electronic-health\* or electronic health\* or mhealth\* or m-health\* or m health\* or mobile health\* or mobile-health\* or emedic\* or e-medic\* or e medic\* or electronic-medic\* or electronic-medic\*).mp.
- #8 (videoconferenc\* or video-conferenc\* or video conferenc\* or teleconsult\* or tele-consult\* or tele consult\* or teleconferenc\* or tele-conferenc\* or tele conferenc\* or videoconsult\* or video-consult\* or video consult\*).mp.
- #9 (telehealth\* or tele-health\* or tele health or telemedic\* or tele-medic\* or telemedic\* or telerehab\* or tele-rehab\* or tele rehab\* or teleconsult\* or tele-consult\* or tele consult\* or telemonitor\* or tele-monitor\* or tele monitor\*).mp.
- #10 ((digital health or digital) adj intervention\*).mp.
- #11 (interactive adj ((health adj communicat\*) or video\* or technolog\* or multimedia)).mp.
- #12 6 or 7 or 8 or 9 or 10 or 11
- #13 5 and 12

## Scopus

(( TITLE-ABS-KEY ( "videoconference" OR "video-conference" OR "video conference" OR "teleconsultation" OR "tele-consultation" OR "tele consultation" OR "teleconference" OR "tele-conference" OR "tele

conference" )) OR ( TITLE-ABS-KEY ( "videoconsultation" OR "video-consultation" OR "video consultation" OR "ehealth" OR "e-health" OR "e health" OR "electronic-health" OR "electronic health" OR "mhealth" OR "m-health" OR "m health" OR "mobile health" OR "mobile-health" )) OR ( TITLE-ABS-KEY ( "emedicine" OR "e-medicine" OR "e medicine" OR "electronic-medicine" OR "electronic-medicine" OR "telehealth" OR "tele-health" OR "tele health" )) OR ( TITLE-ABS-KEY ( "telemedicine" OR "tele-medicine" OR "telemedicine" OR "telerehabilitation" OR "tele-rehabilitation" OR "tele rehabilitation" OR "teleconsultation" OR "tele-consultation" OR "tele consultation" OR "telemonitor" OR "tele-monitor" OR "tele monitor" )) OR ( TITLE-ABS-KEY ( "digital health intervention" OR "digital intervention" )) OR ( TITLE-ABS-KEY ( "interactive video" OR "interactive technology" OR "interactive multimedia" OR "interactive health" )) AND ( TITLE-ABS-KEY ( "physiotherapy" OR "physical therapy" OR "physical activity" OR "physical training" OR "physical conditioning" OR "exercise" OR "rehabilitation" OR "rehab" OR "exercise therapy" OR "exercise training" ))

## **Pedro**

Telerehab\* exercis\*
